# Supplementary material for: Improved de novo genomic assembly for the domestic donkey
Source: PubMed Central journal article supplement — Sci Adv. 2018 Apr 4;4(4):eaaq0392. doi: 10.1126/sciadv.aaq0392 (PMC5938232; doi:10.1126/sciadv.aaq0392), 2018-04-04
Supplement: aaq0392_SM.pdf [file aaq0392_SM.pdf]

## Supplementary Materials for

### Improved de novo genomic assembly for the domestic donkey

Gabriel Renaud, Bent Petersen, Andaine Seguin-Orlando, Mads Frost Bertelsen, Andrew Waller, Richard Newton, Romain Paillot, Neil Bryant, Mark Vaudin, Pablo Librado, Ludovic Orlando

Published 4 April 2018, *Sci. Adv.* **4**, eaq0392 (2018)

DOI: 10.1126/sciadv.aq0392

#### This PDF file includes:

- Supplementary Materials and Methods
- section S1. Supplementary Methods
- fig. S1. Venn diagram of the protein-coding genes that were annotated in the donkey assembly versus the protein-coding gene annotation for the horse.
- fig. S2. Venn diagram of the protein-coding genes that were annotated in the donkey assembly published by Huang *et al.* (15) versus the protein-coding gene annotation for the *E. caballus* genome (version EquCab2.0) using Ensembl genes (version 86).
- fig. S3. Alignment of horse chromosomes to six donkey scaffolds with putative signs of translocations.
- fig. S4. Alignment of donkey scaffolds to corresponding horse chromosomes.
- fig. S5. Genetic distance between scaffolds spanning the gap on ECA12 versus the background.
- fig. S6. Measured heterozygosity rates for the donkey scaffolds aligned to the various horse chromosomes.
- fig. S7. Nei's genetic distance by windows of 30 kb between donkey and horse chromosomes for scaffolds with signs of inversions.
- fig. S8. Effective population size over time by aligning to the horse reference.
- fig. S9. Measured heterozygosity rates for the African wild ass using the donkey scaffolds aligned to the horse chromosomes.
- table S1. Translocations found between the donkey and horse scaffolds.
- table S2. Gene ontologies of biological processes and enriched Reactome pathways associated with genes found in donkey scaffolds with signs of inversions when compared to the horse genome.

- table S3. Human phenotypes, human diseases, and pathways associated with genes enriched in detected ROHs.
- table S4. Horse sequences used for the detection of donkey scaffolds pertaining to the Y chromosome.
- table S5. Heterozygosity rates for various species of asses and zebras computed when aligning to the donkey reference described in this study and recomputed on the basis of the data reported by Jónsson *et al.* (9), which were aligned to the horse reference.
- table S6. Listing missing proteins in complete and partially complete Eukaryotic Orthologous Groups from the Core Eukaryotic Genes Mapping Approach.
- table S7. Repeat elements and low-complexity DNA sequences masked in the donkey genome using RepeatMasker.
- table S8. Repeat elements and low-complexity DNA sequences masked in the donkey genome using the second of the RepeatMasker using the model generated from RepeatModeler as custom library input on the previously masked genome.
- table S9. Statistics of the completeness of the different versions of the donkey genome based on 248 Core Eukaryotic Genes.
- References (44–62)

## Supplementary Materials and Methods

### section S1.

#### *Chicago library sequencing*

Two Chicago libraries were prepared as described previously (14). Briefly, for each library, 500 ng of high-molecular-weight genomic DNA (~50 kb mean fragment size) was reconstituted into chromatin *in vitro* and fixed with formaldehyde. Fixed chromatin was then digested with the MboI enzyme, the 5' overhangs were filled in with biotinylated nucleotides and then free blunt ends were ligated. After ligation, crosslinks were reversed and the DNA purified from protein. Purified DNA was treated to remove biotin that was not internal to ligated fragments. The DNA was then sheared to ~350 bp mean fragment size and sequencing libraries were generated using NEBNext Ultra enzymes and Illumina-compatible adapters. Biotin-containing fragments were then isolated using streptavidin beads before PCR enrichment of the library. The libraries were sequenced on the Illumina (44) HiSeq 2500 instrument at the Danish National DNA Sequencing Center to produce 365M 2X150 bp read pairs, providing 101x physical coverage (1-50 kb pairs). Physical coverage measures the average number of times that a read-pair of 1-100 kb span a given nucleotide in the genome.

#### *Scaffolding the draft genome with HiRiSE and quality metrics*

A draft genome assembly previously reported (2), representing 2,320 Mb with a scaffold N50 of 434 kb, Illumina shotgun sequence data, and Chicago library read pairs in FASTQ format were used as input data for HiRiSE, a software pipeline designed specifically for using Chicago data to assemble genomes (14). Shotgun and Chicago library sequences were aligned to the draft input assembly using a modified SNAP read mapper (<http://snap.cs.berkeley.edu>). The separation of Chicago read pairs mapped within draft scaffolds were analyzed by HiRise to produce a likelihood model for genomic distance between read pairs, and the model was used to identify putative misjoins and score prospective joins. After scaffolding, shotgun sequences were used to close gaps between contigs. Quality metrics for this assembly were obtained with Quast (45) with default parameters.

### *Repeat masking*

Repeats and low complexity DNA sequences were masked in the genome prior to gene annotation using RepeatMasker version 4.0.5 (46) using the species repeat database ‘mammals’ with RepBase Update 20150807, RM database version 20150807 (table S7).

Remaining donkey specific repetitive elements were predicted *de novo* using RepeatModeler version open-1.0.8 (46) on the masked genome. Subsequently, a second round of RepeatMasker was run with the model generated from RepeatModeler as custom library input on the previously masked genome (tables S8-S9).

### *Gene Annotation*

Genome annotation was performed using the genome annotation pipeline Maker2 version 2.31.8 (47) with ab-initio and homology-based gene predictions. Protein sequences from *homo sapiens*, *Equus caballus* and *Mus musculus* was used for homology-based gene prediction. As no training gene models were available for Equids, we used CEGMA (48,49) to train the ab-initio gene predictor SNAP (50), rather than using the *de-novo* gene predictor Augustus (51). Maker2 was run with “model\_org=simple, softmask=1, augustus\_species=human” and the “snaphmm” parameter was set to the HMM generated in the manual training of SNAP. Missing proteins in complete and partial complete KOGs can be found in table S6.

Orthologs in the horse genome were obtained using OrthoFinder (52) with default parameters. The horse protein-coding genes were obtained from Ensembl Genes (EquCab2.0, version 86). The parsing of the output obtained in OrthoFinder was done in-house using custom scripts. The gene symbols for the horse proteins were obtained using Biomart (53).

### *Heterozygosity and estimates of effective population size*

Mapping of shotgun data from different *Equus* species to the donkey reference was performed using BWA v. 0.5.9 (54) with default parameters. Heterozygosity rates, both globally and locally, were computed using ANGSD v. 0.915-26 (55). Confidence bounds for the rate of

heterozygosity were obtained using a standard error interval for a binomial distribution. The local estimates of heterozygosity were performed using a window size of 50 kb with a step of 10 kb. The effective population size over time for the different species aligned to this donkey reference was performed using PSMC v. 0.6.5-r67 (56) using a base quality filter of 35, and parameters “-N25 -r5 -p 4+25\*2+4+6”. The results were plotted using mutation rate of  $7.242 \times 10^{-9}$  mutations per generation and site, and assuming a generation time of eight years. To minimize biases due to sex chromosomes, only donkey scaffolds aligning to horse autosomal chromosomes were considered.

Runs of homozygosity were identified using overlapping windows of 50 kb with a heterozygosity rate consistently less than the overall average of 0.068% with a total combined length greater than 500 kb. The analysis for pathway enrichment was performed using WebGestalt (57), using the total set of annotated genes for the donkey genomes as background reference set. Again, only genes within scaffolds that were aligned to horse autosomal chromosomes were considered. The ROHs plots were generated using the qqman package (58)

### *Genome-wide alignments*

The alignment of the different scaffolds to their corresponding genome chromosomes was performed using the nucmer program part of mummer package (59). This correspondence was established using the same 101-mers alignments that were used for the synteny plot.

As the orientation of the scaffold was not known *a priori*, we oriented the scaffolds in order to minimize the number of rearrangements. Furthermore, by leveraging on the chromosome map between horse and donkey genomes described in (60), we manually reverse complemented certain scaffolds to make sure that the orientation of the scaffolds was consistent with their map. However, in the main genome-wide plot presented in Fig. 4, the orientation of the scaffolds was selected using an automated procedure which maximizes similar chromosomal strands rather than minimizing the number of rearrangements.

The donkey divergence to the horse genome was computed using Nei's standard genetic distance (D) (61) using windows of 30 kb. Scaffolds were assigned as potentially coming from the Y chromosome by aligning donkey scaffolds to a set of 19 contigs from the horse Y chromosome (see table S4) using BLAT v.35 (62) with default parameters. To avoid spurious alignments to the X chromosome, the gene annotation for each scaffold potentially originating from the Y chromosome were aligned using NCBI Blast against the non-redundant protein database 'nr'. If a scaffold contained genes mapping to the X chromosome in horses, this scaffold was flagged as being potentially from the X chromosome rather than the Y one.

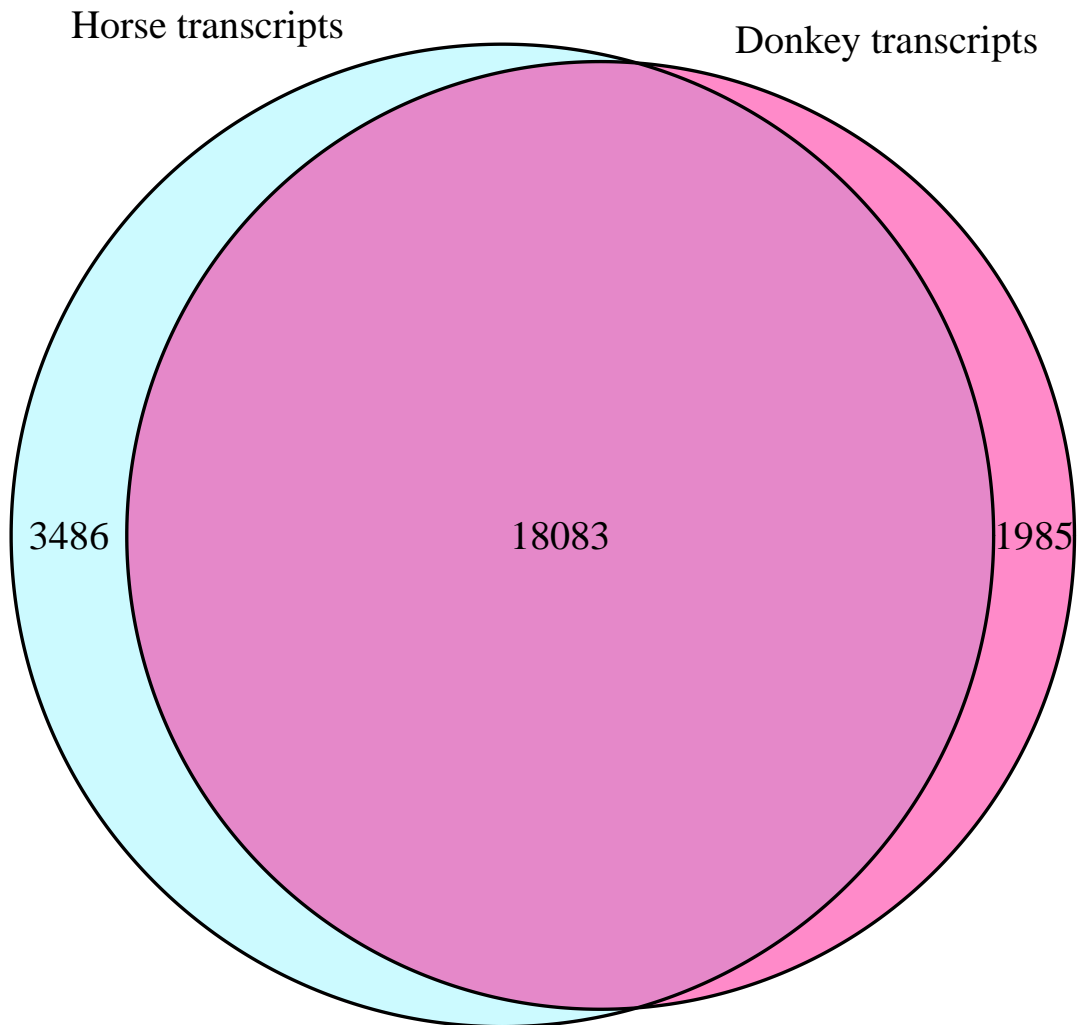

**fig. S1. Venn diagram of the protein-coding genes that were annotated in the donkey assembly versus the protein-coding gene annotation for the horse.** The reference for the horse (*Equus caballus*) genome was EquCab2 and Ensembl Genes (version 86) were used. The comparison to the horse annotation was performed using a single transcript per predicted protein-coding gene.

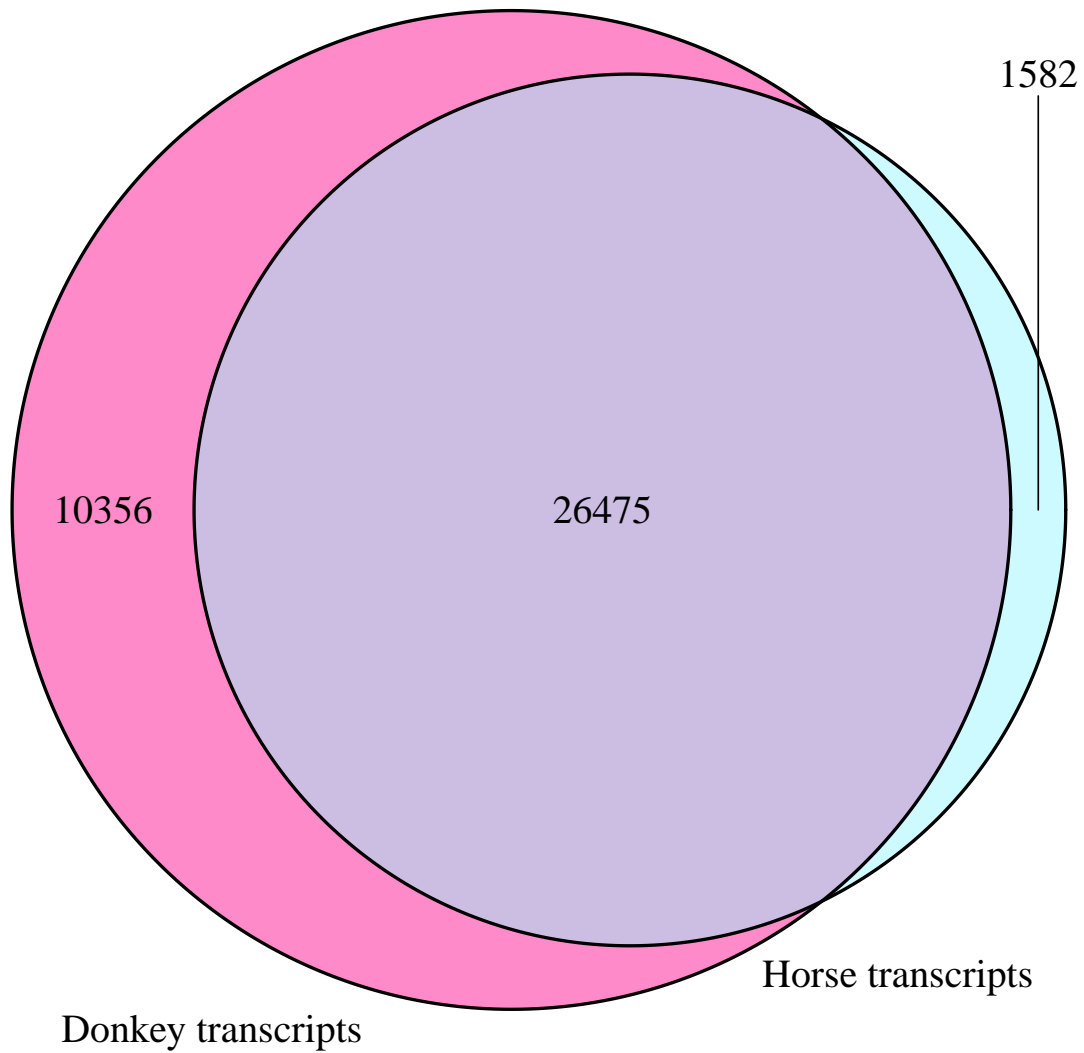

**fig. S2. Venn diagram of the protein-coding genes that were annotated in the donkey assembly published by Huang *et al.* (15) versus the protein-coding gene annotation for the *E. caballus* genome (version EquCab2.0) using Ensembl genes (version 86).**



Fig. S3

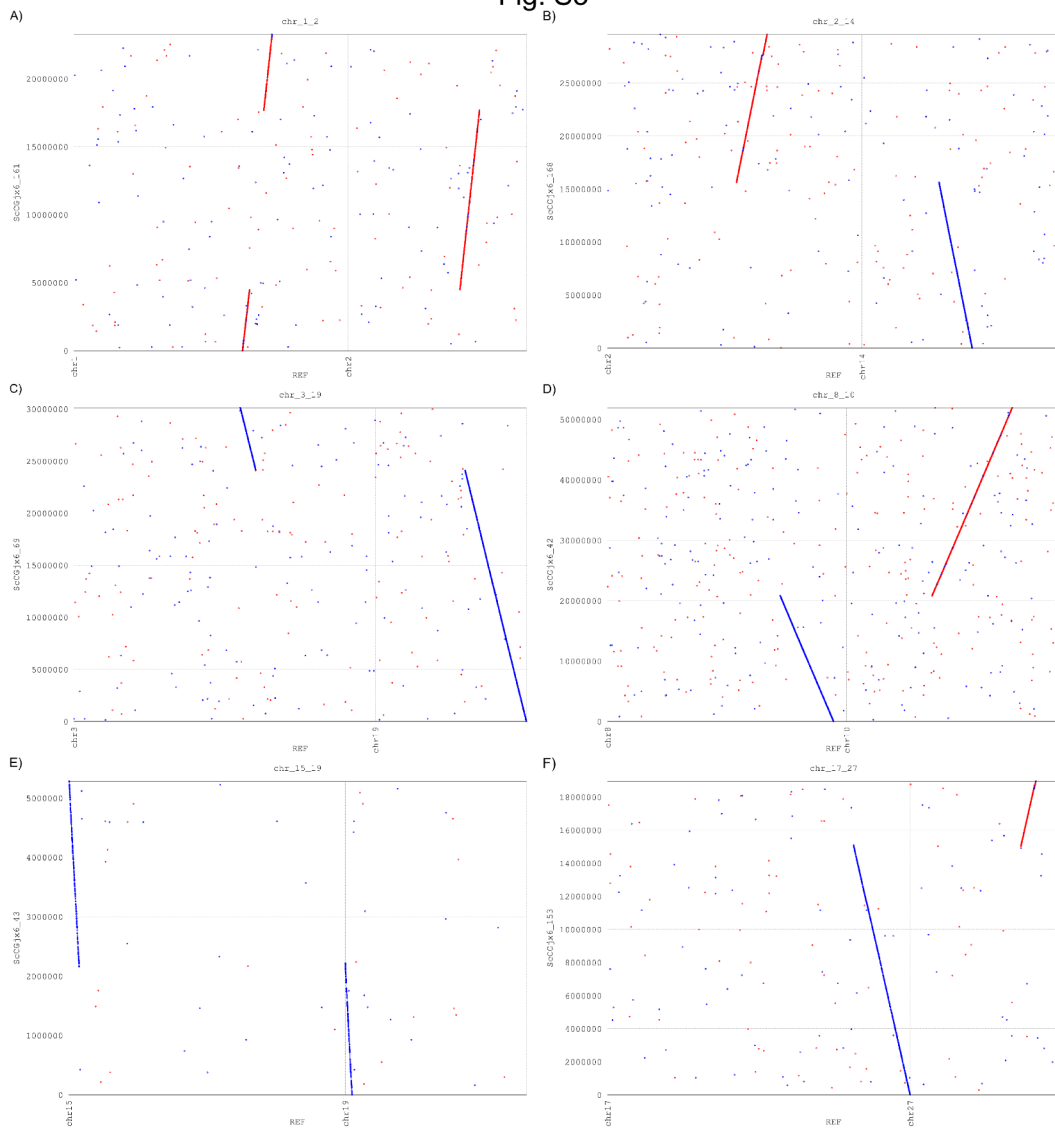

**fig. S3. Alignment of horse chromosomes to six donkey scaffolds with putative signs of translocations.** These alignments were performed with MUMmer v3.23.

Fig. S4 1 of 4

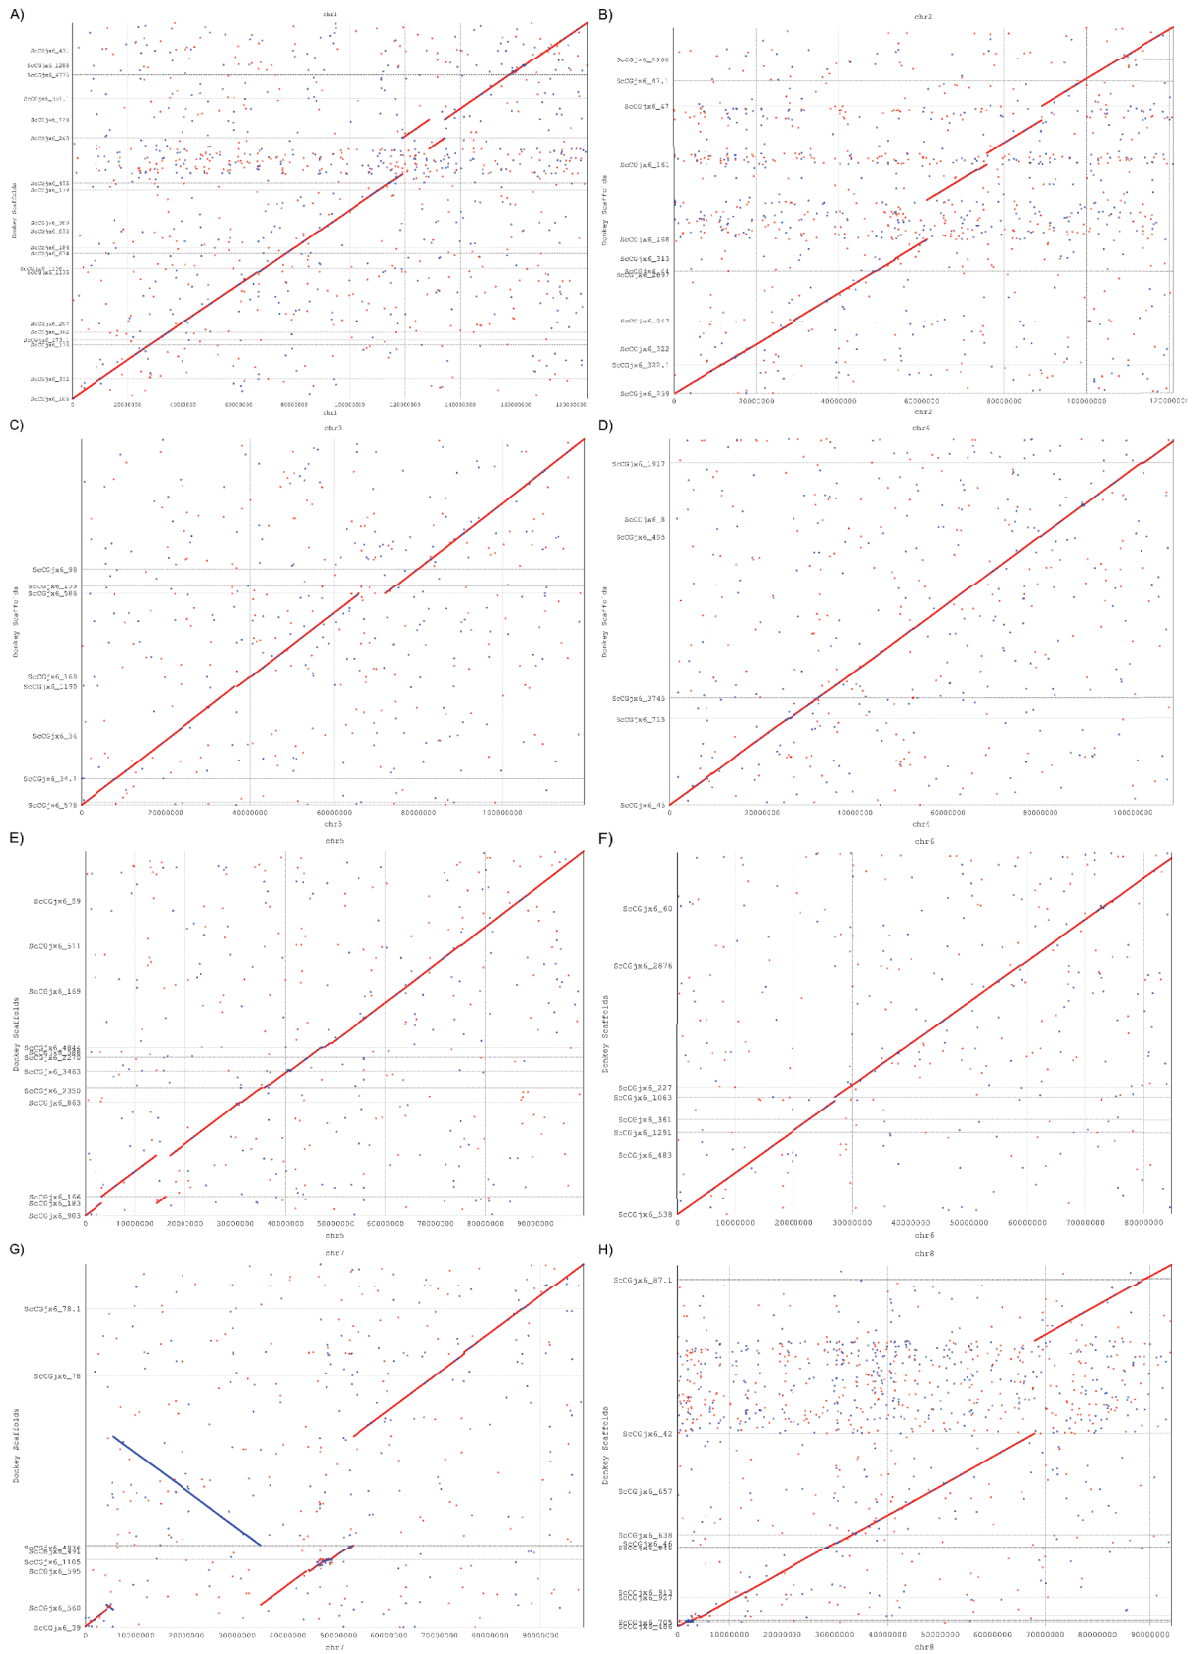

**fig. S4.** Alignment of donkey scaffolds to corresponding horse chromosomes. These alignments were performed with MUMmer v3.23.

Fig. S4 2 of 4

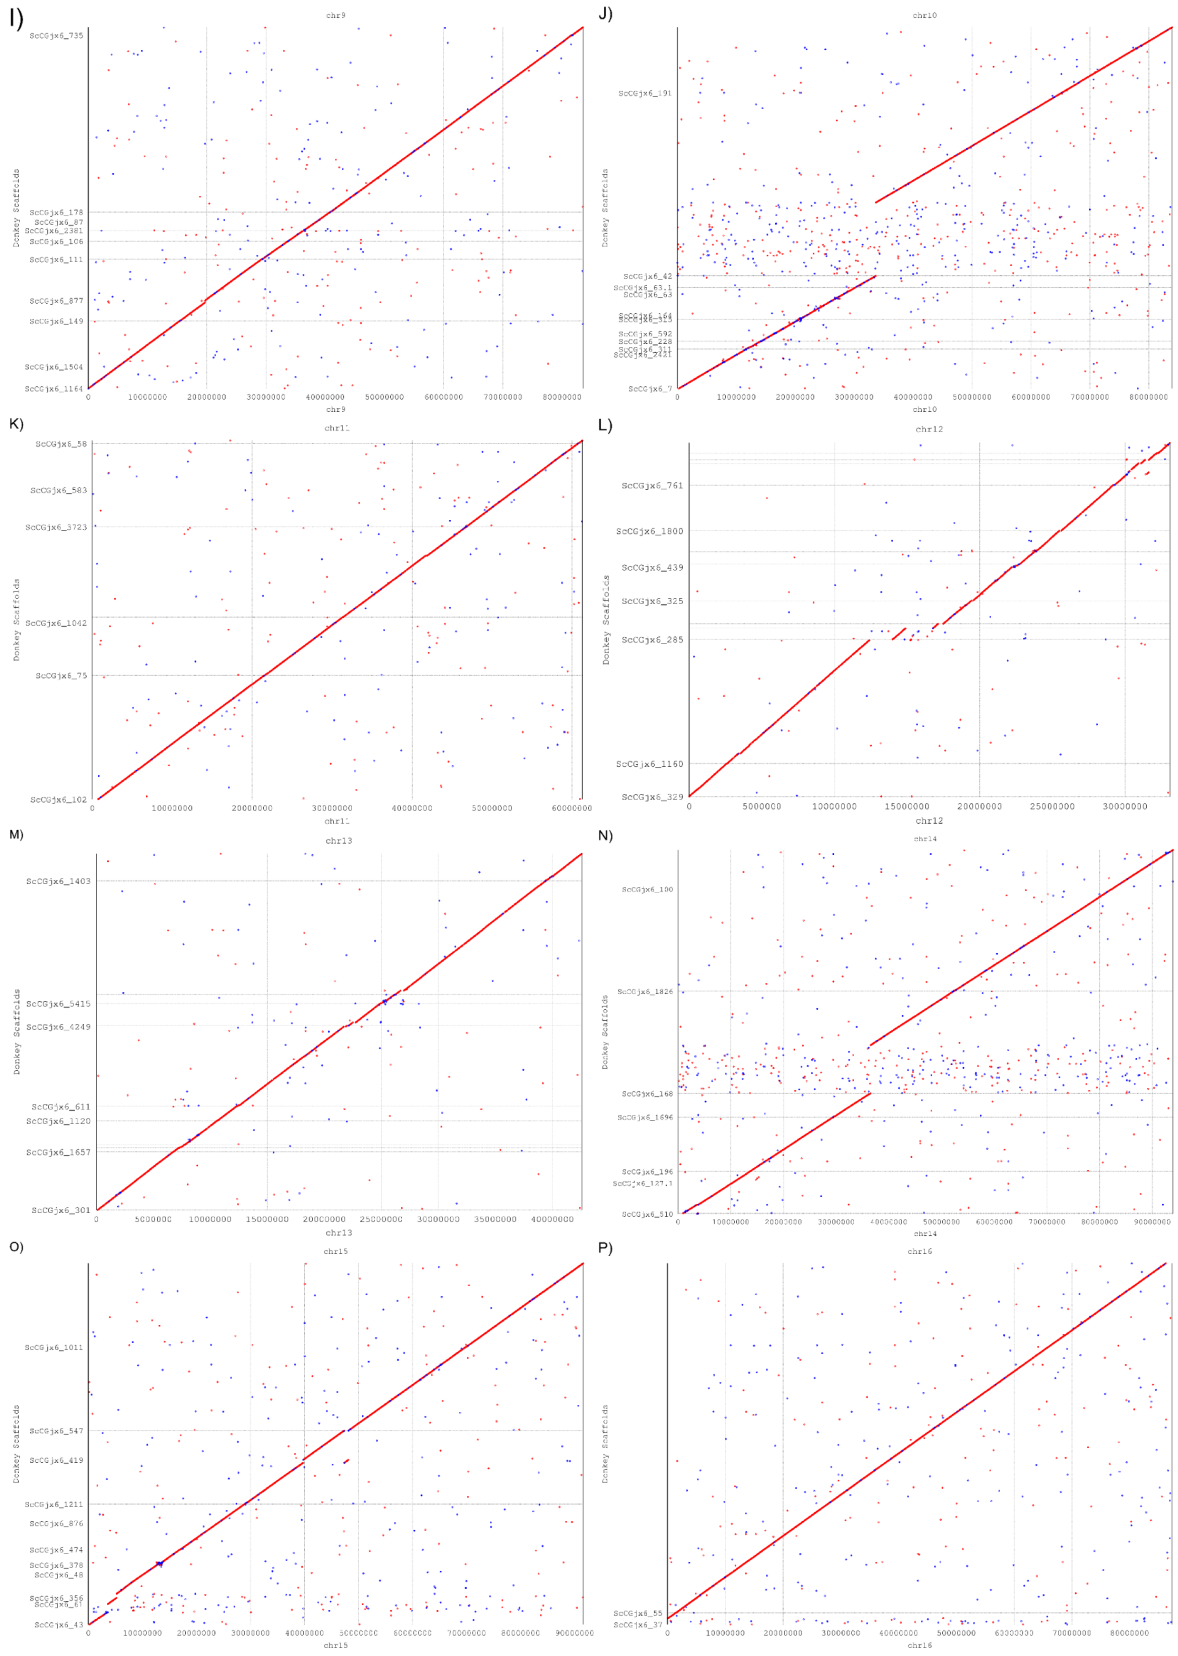

Fig. S4 3 of 4

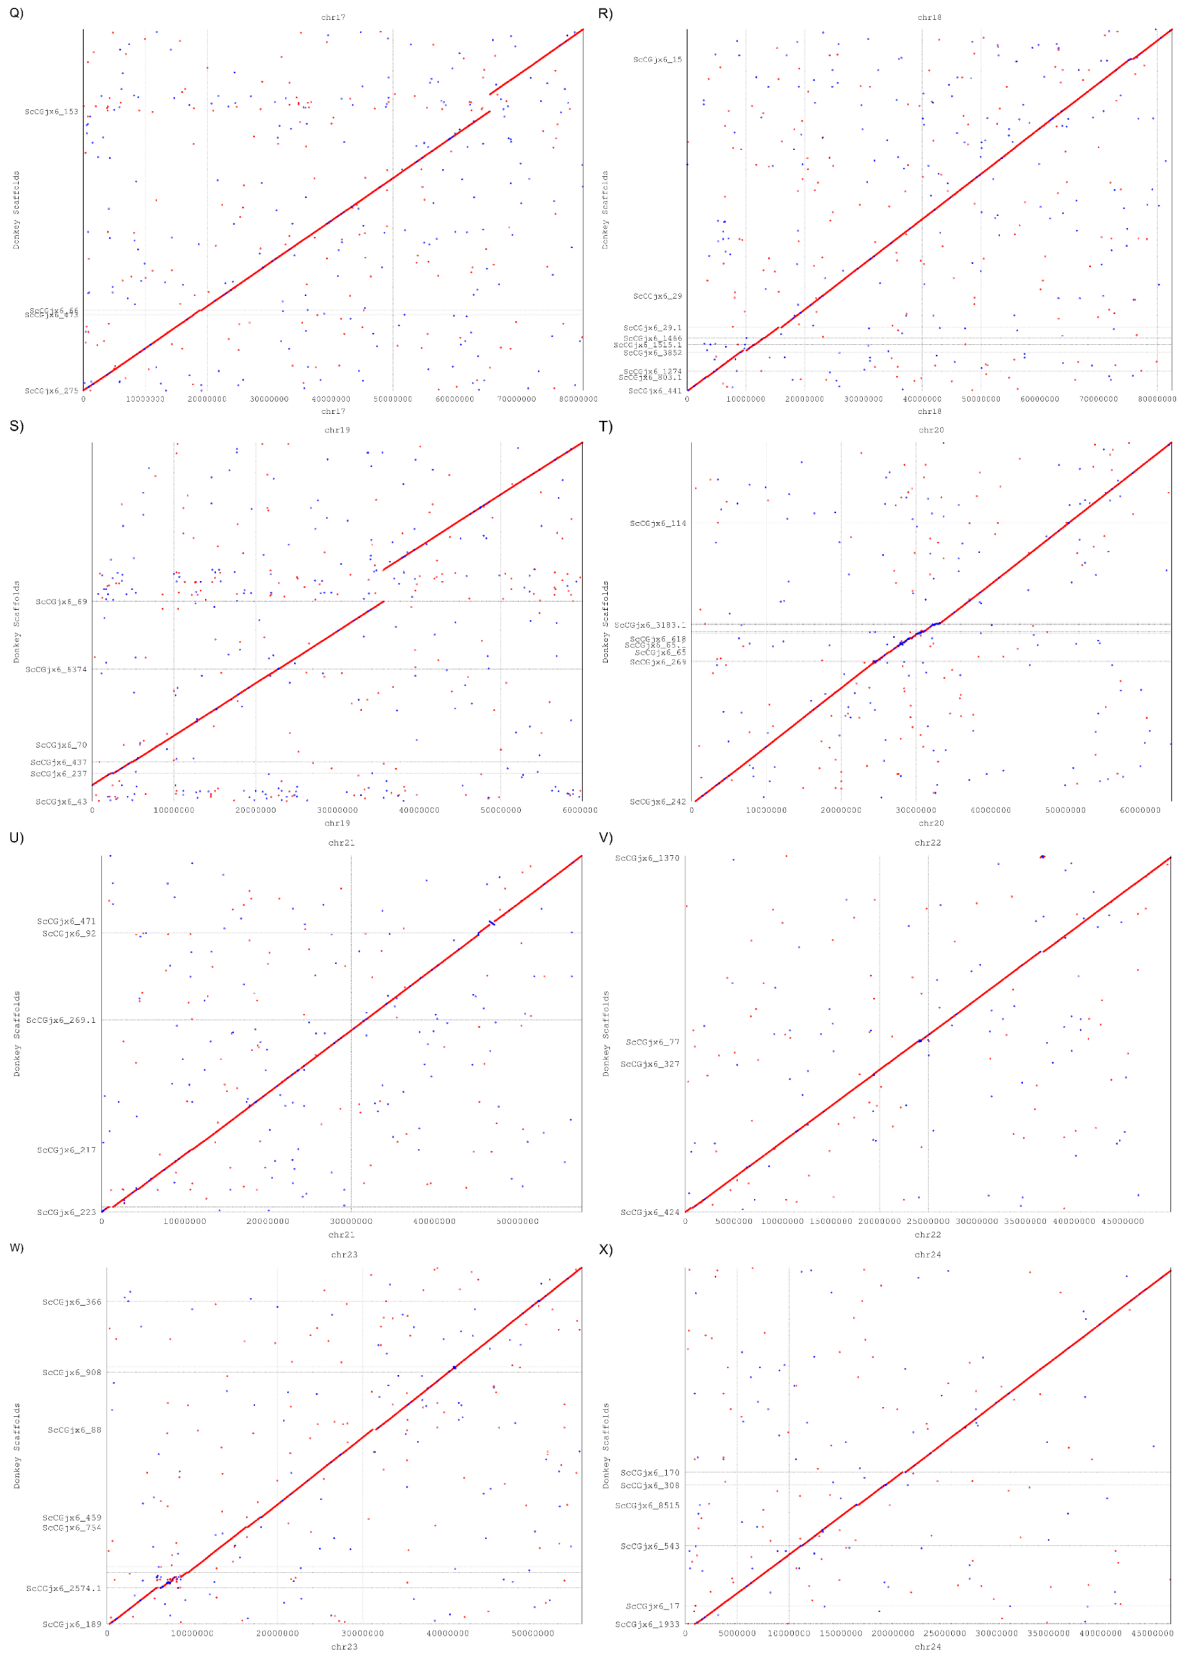

Fig. S4 4 of 4

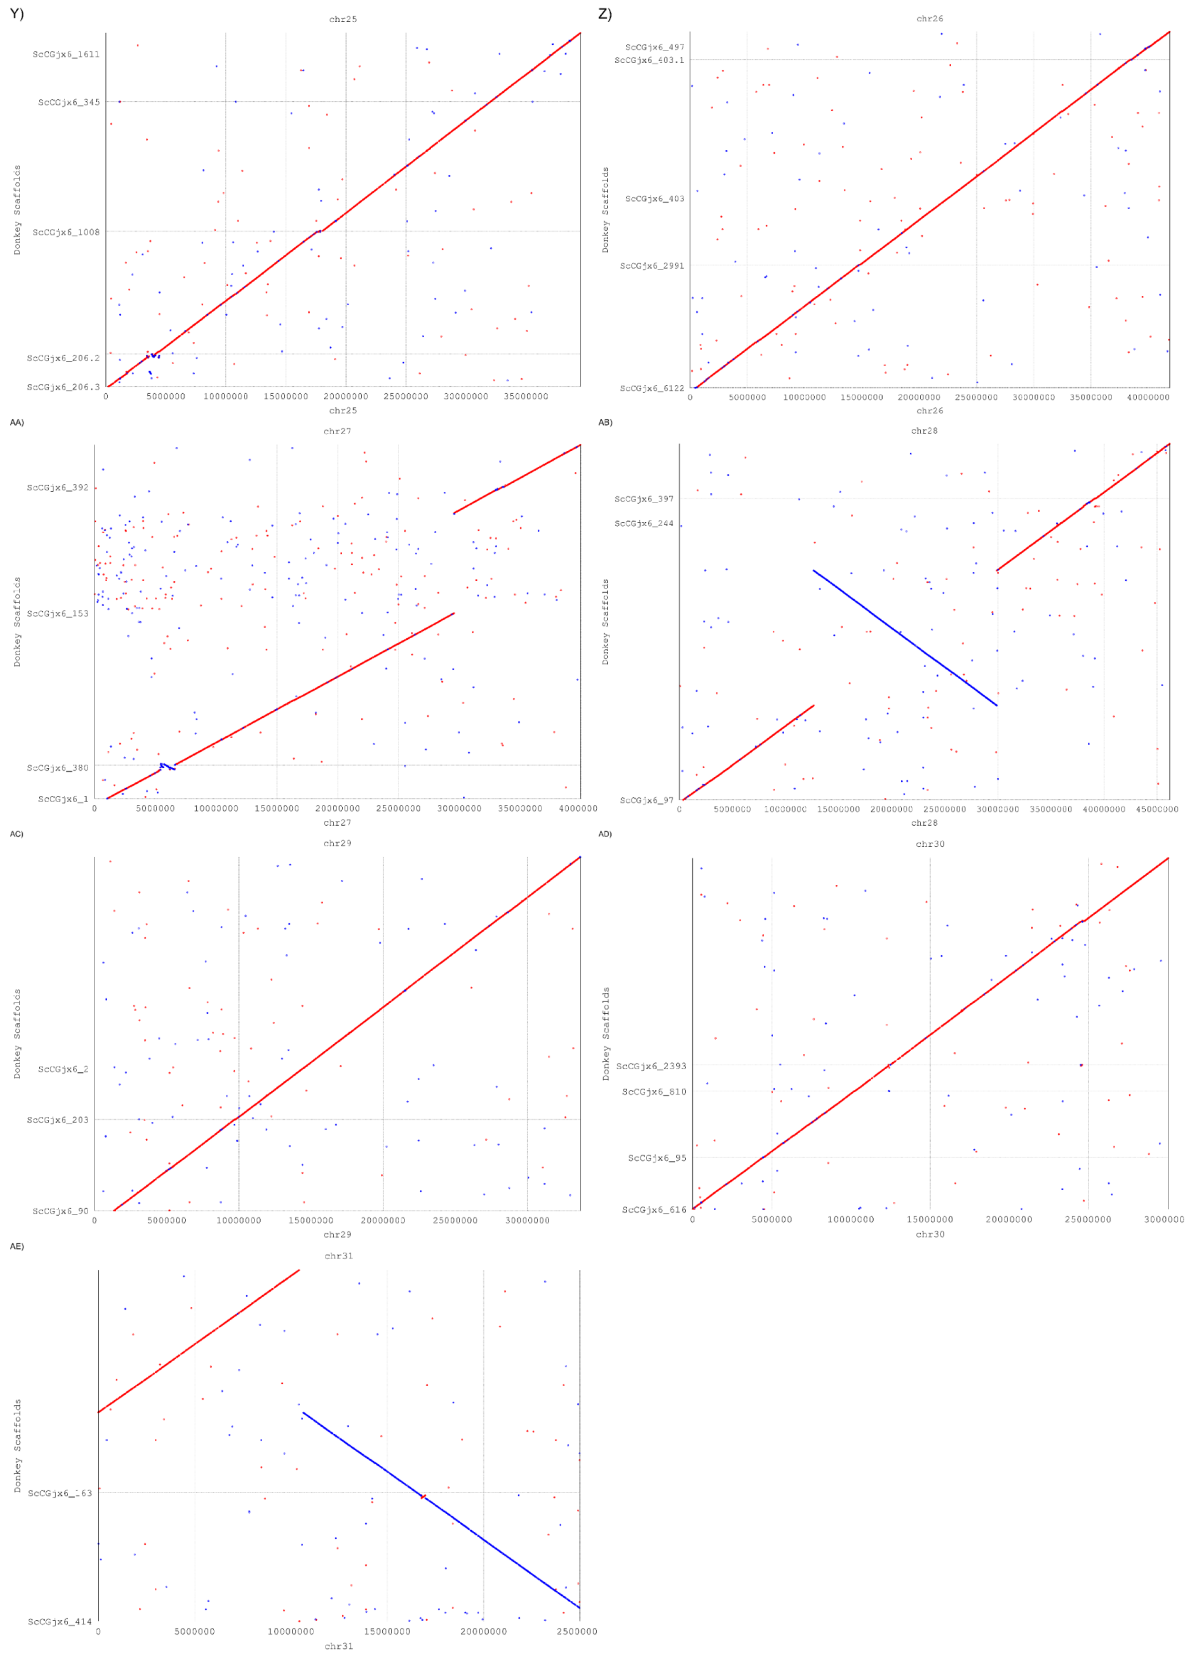

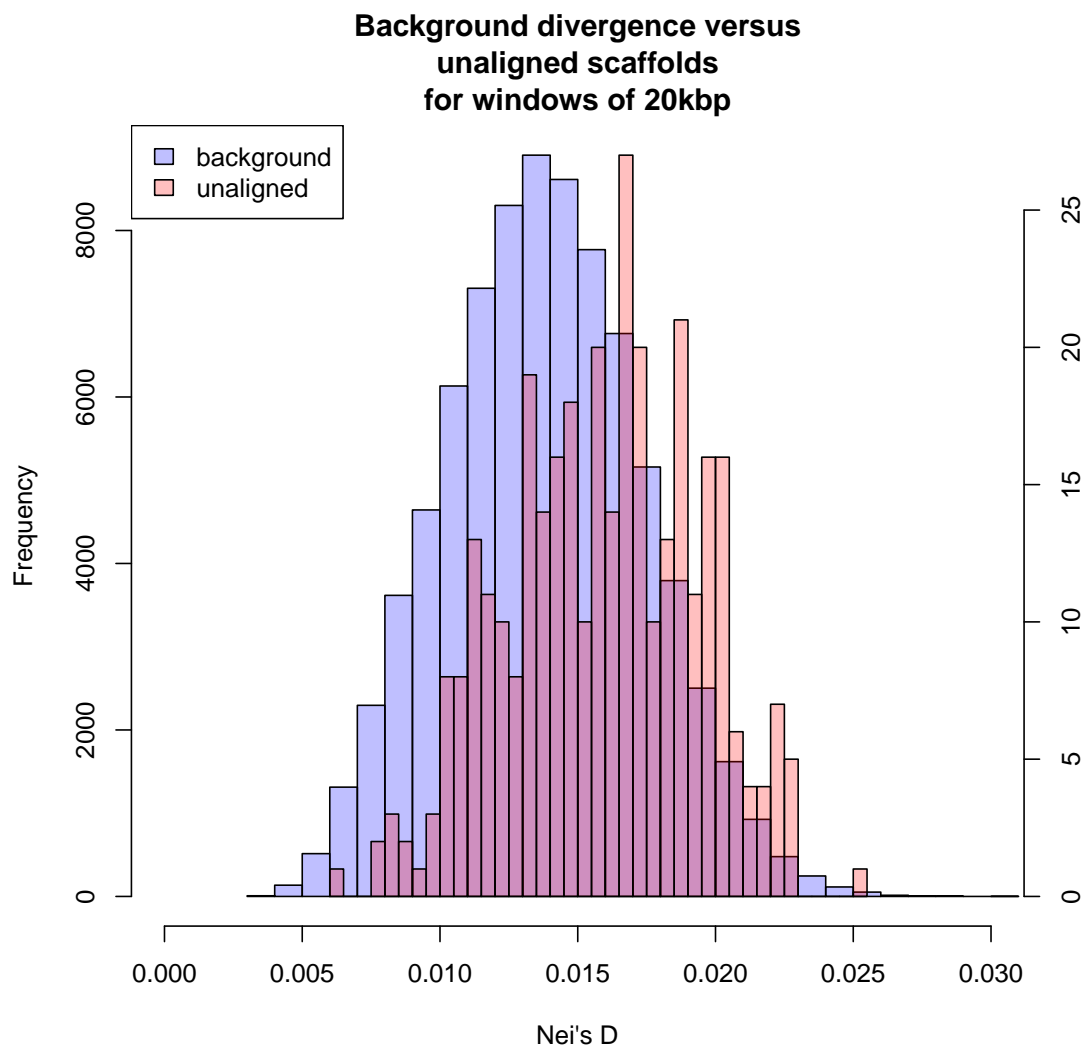

**fig. S5. Genetic distance between scaffolds spanning the gap on ECA12 versus the background.**

Fig. S6 1 of 4

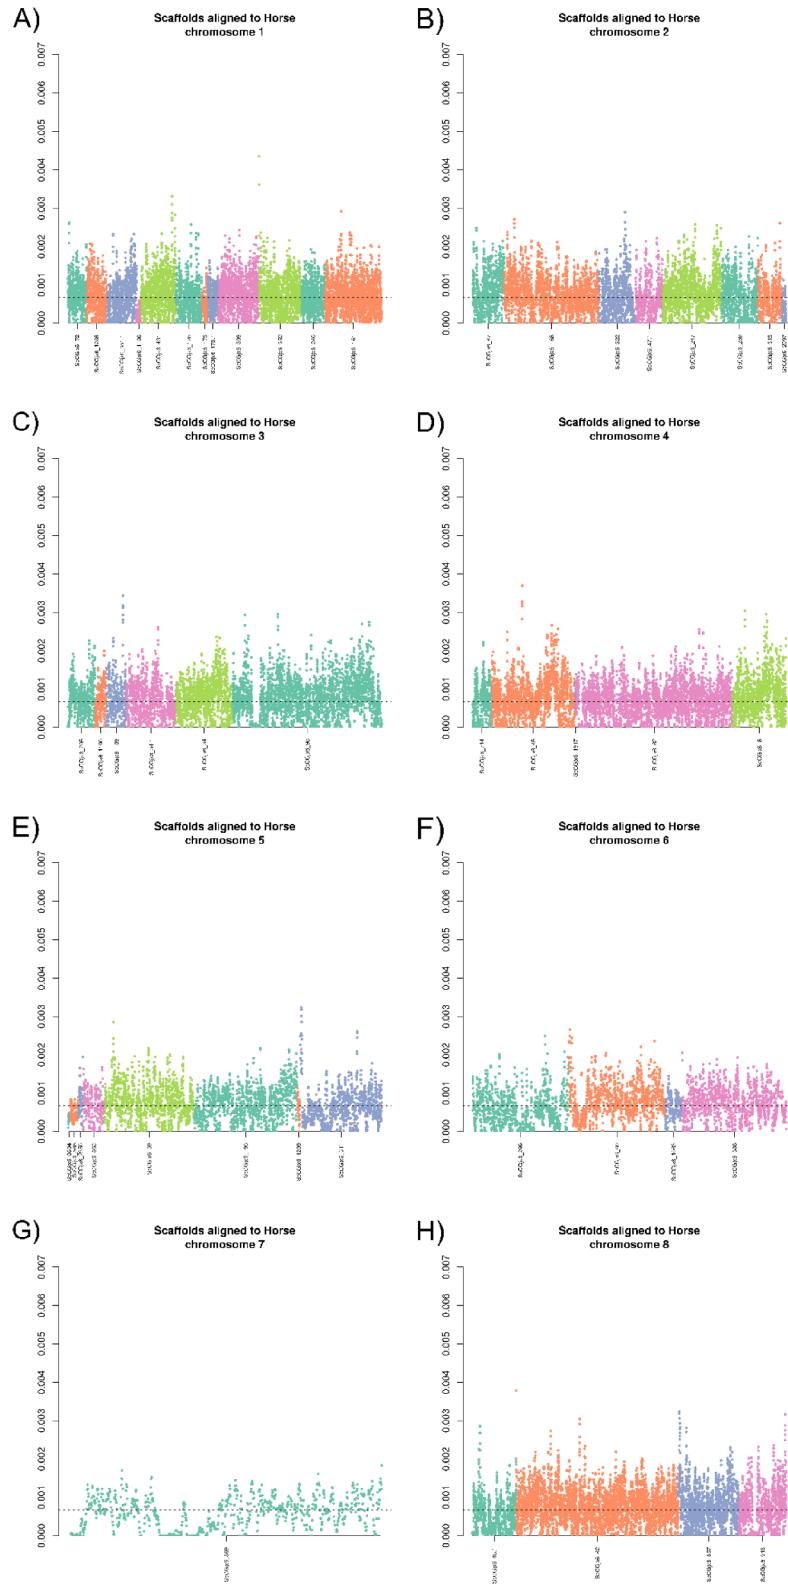

**fig. S6. Measured heterozygosity rates for the donkey scaffolds aligned to the various horse chromosomes.**





Fig. S6 3 of 4

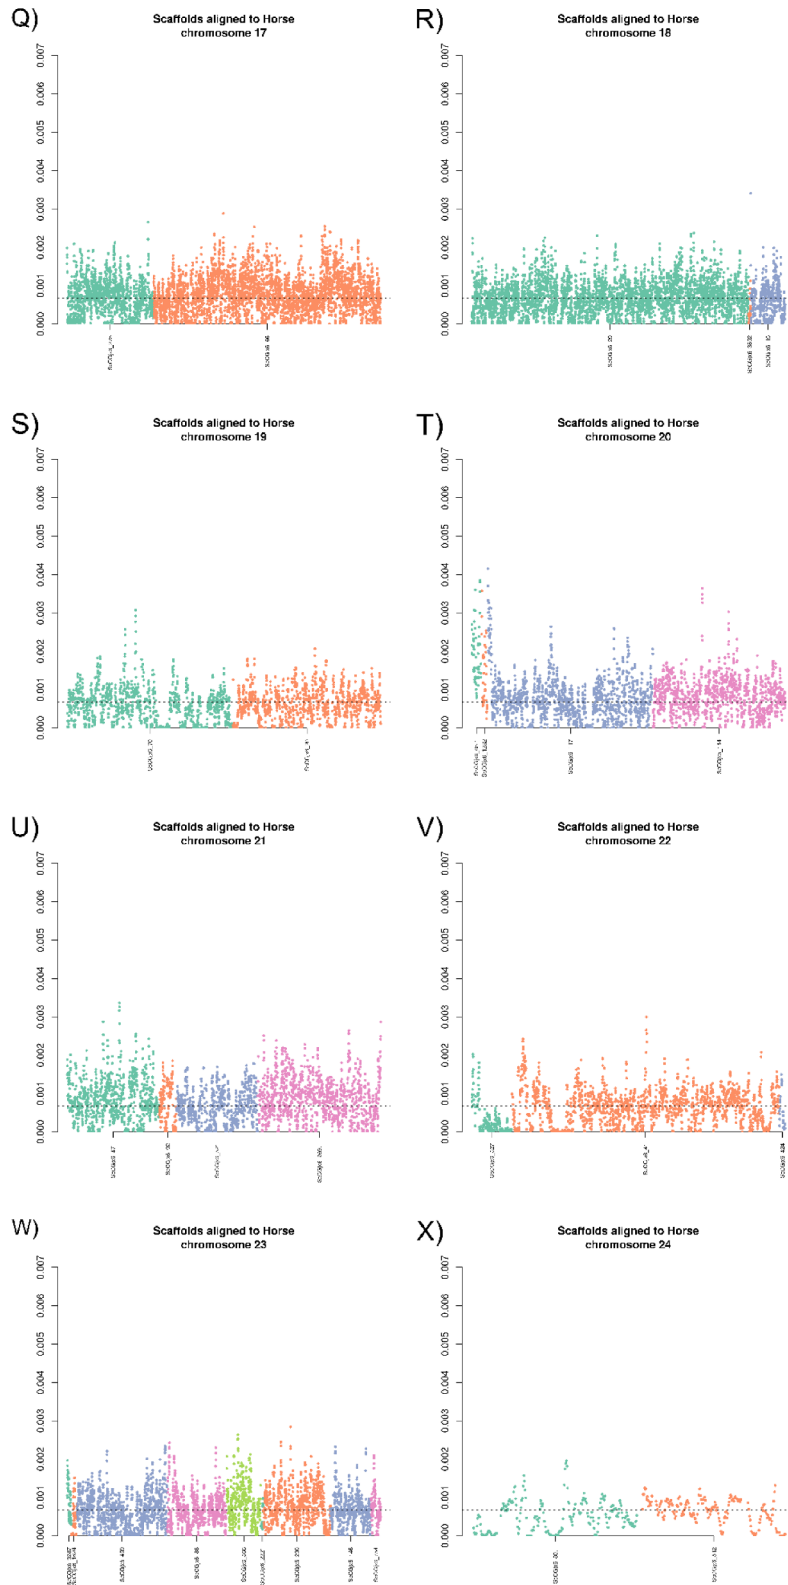

Fig. S6 4 of 4

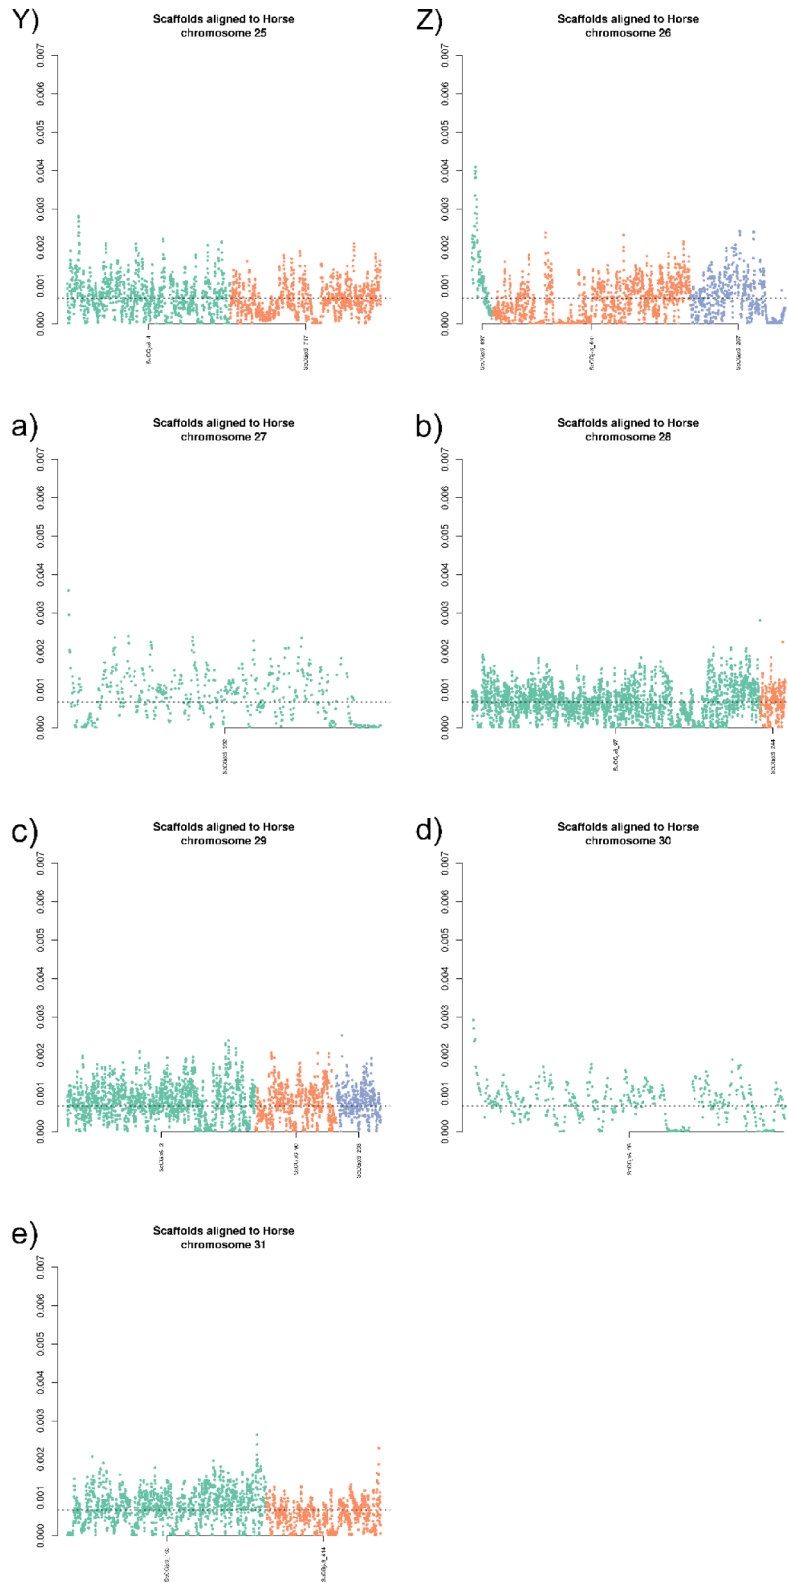

Fig. S7

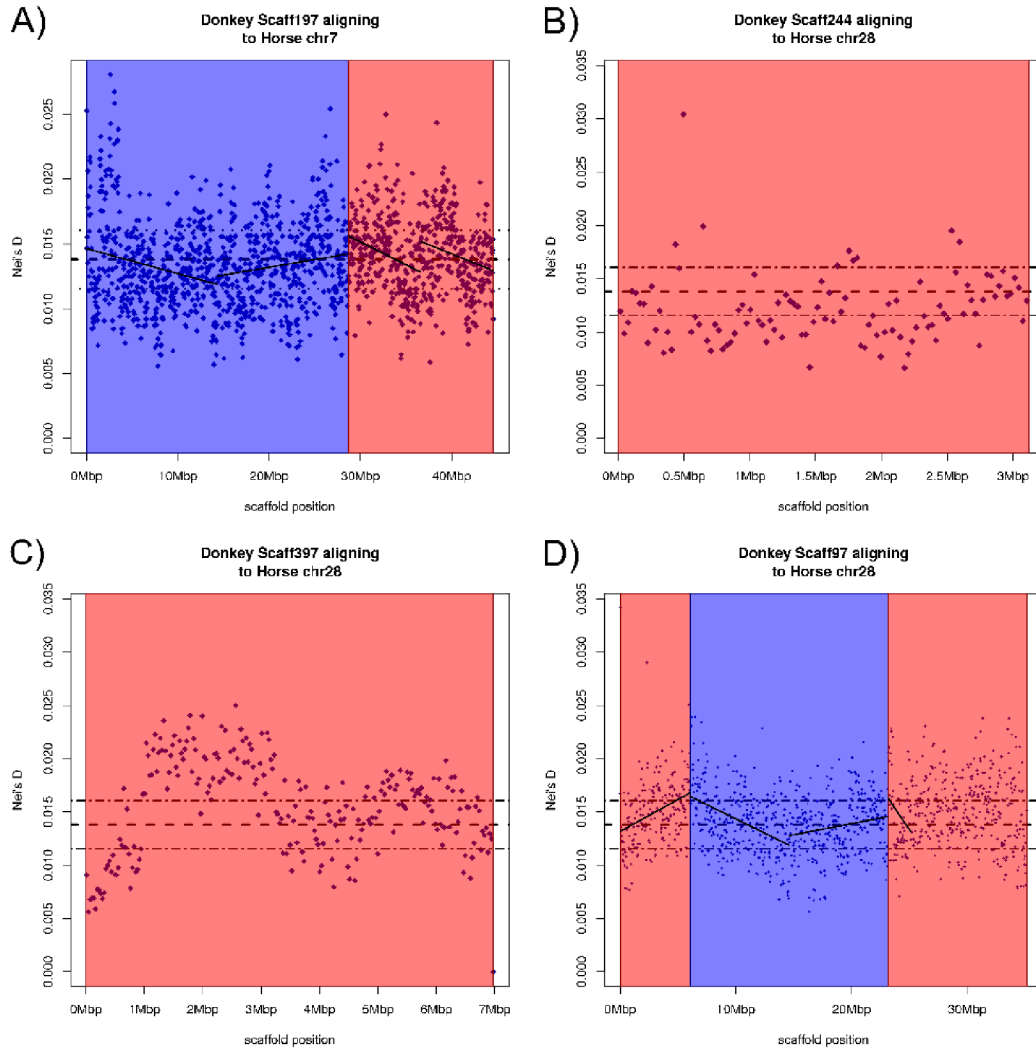

**fig. S7. Nei's genetic distance by windows of 30 kb between donkey and horse chromosomes for scaffolds with signs of inversions. The areas in blue are potentially on different strands and in red, on the same strand.**

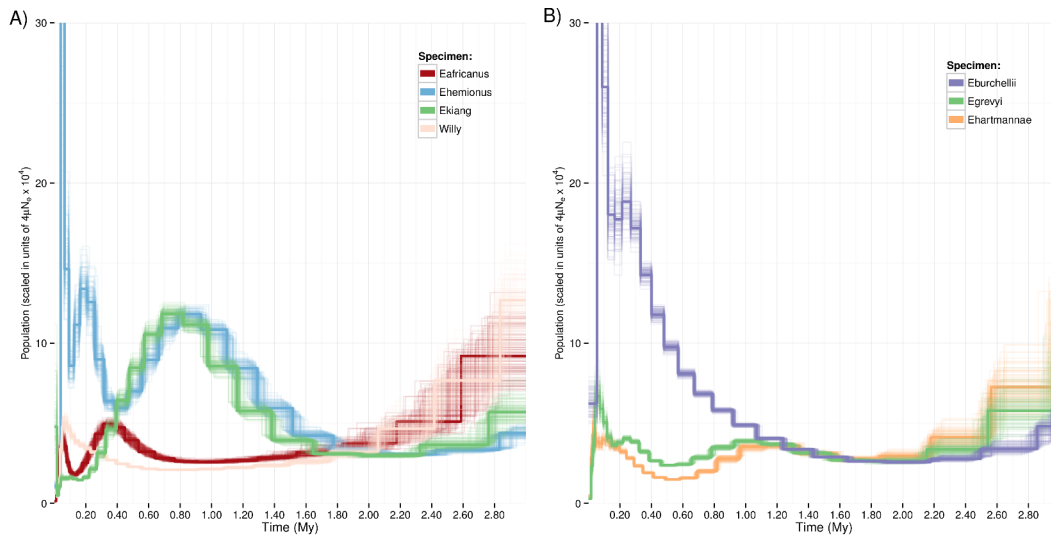

**fig. S8. Effective population size over time by aligning to the horse reference.** PSMC reconstruction of the effective population size over time using the data from (9) which had been aligned to the horse genome, for different *ass* species (A) and zebra species (B). For both, the effective population over time are estimated to be lower when the new donkey reference is used which is likely due to the greater phylogenetic proximity of this new reference.

Fig. S9 1 of 4

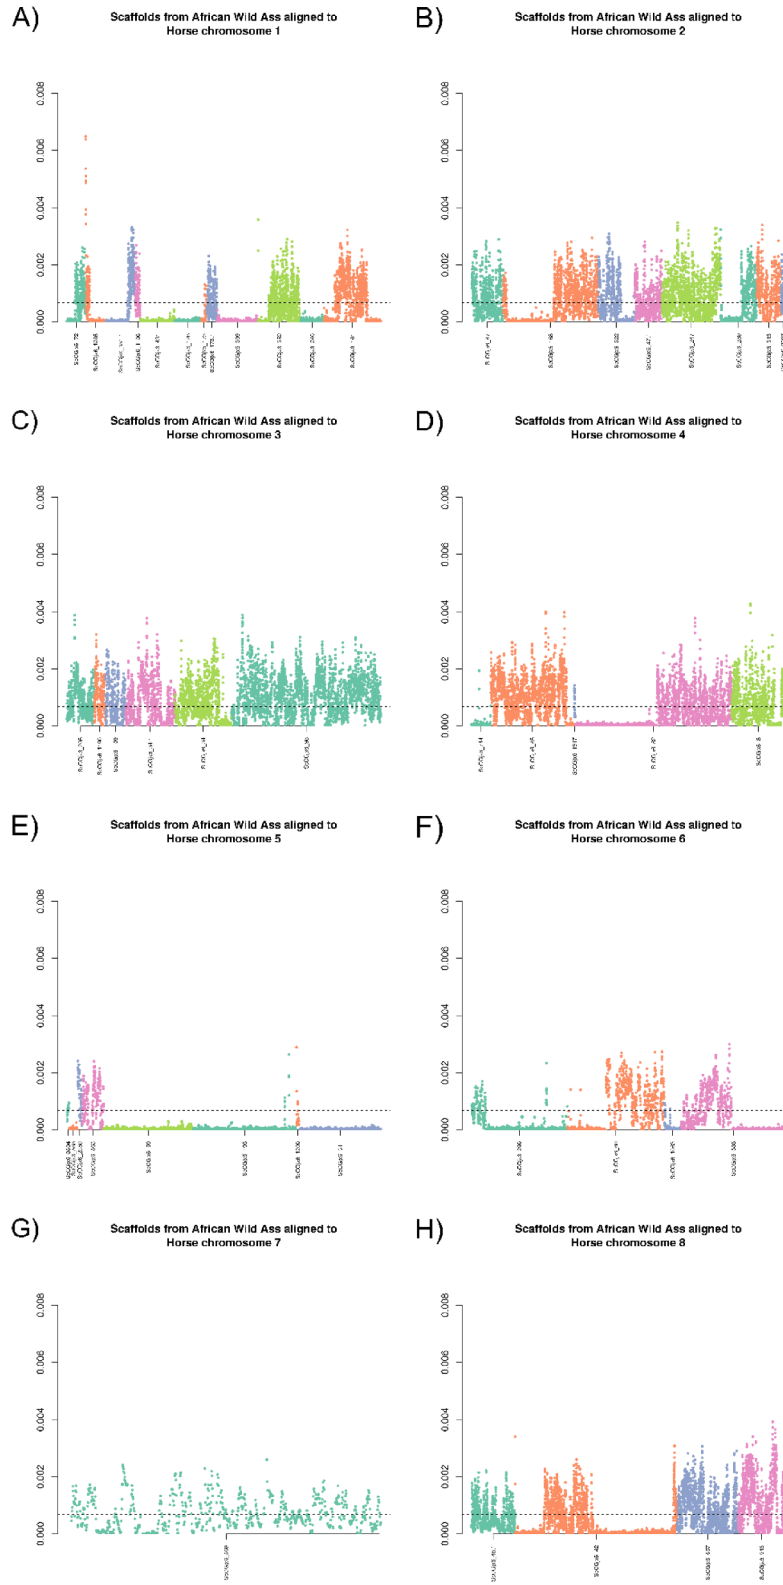

**fig. S9. Measured heterozygosity rates for the African wild ass using the donkey scaffolds aligned to the horse chromosomes.**

Fig. S9 2 of 4

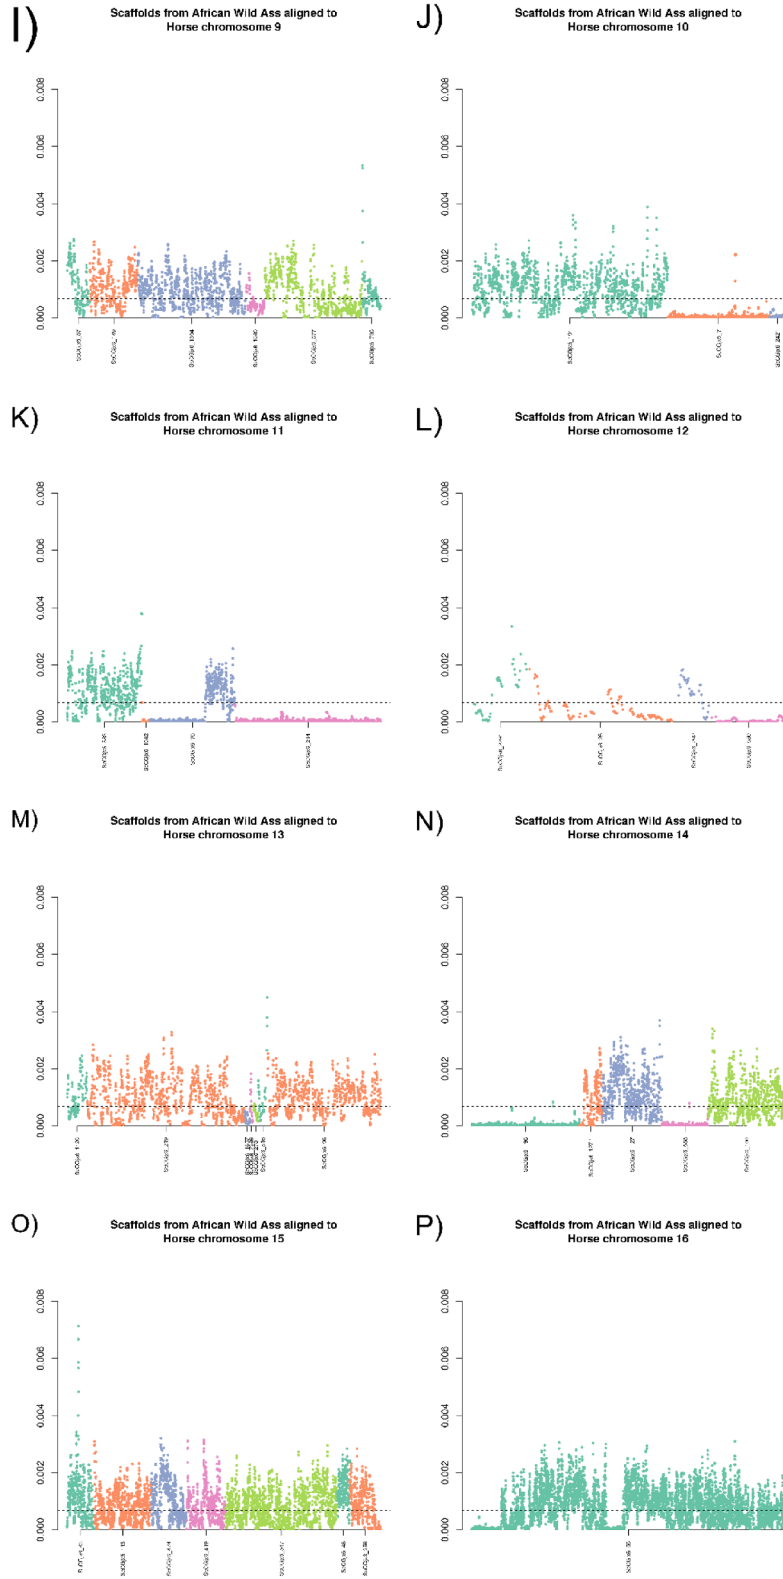

Fig. S9 3 of 4

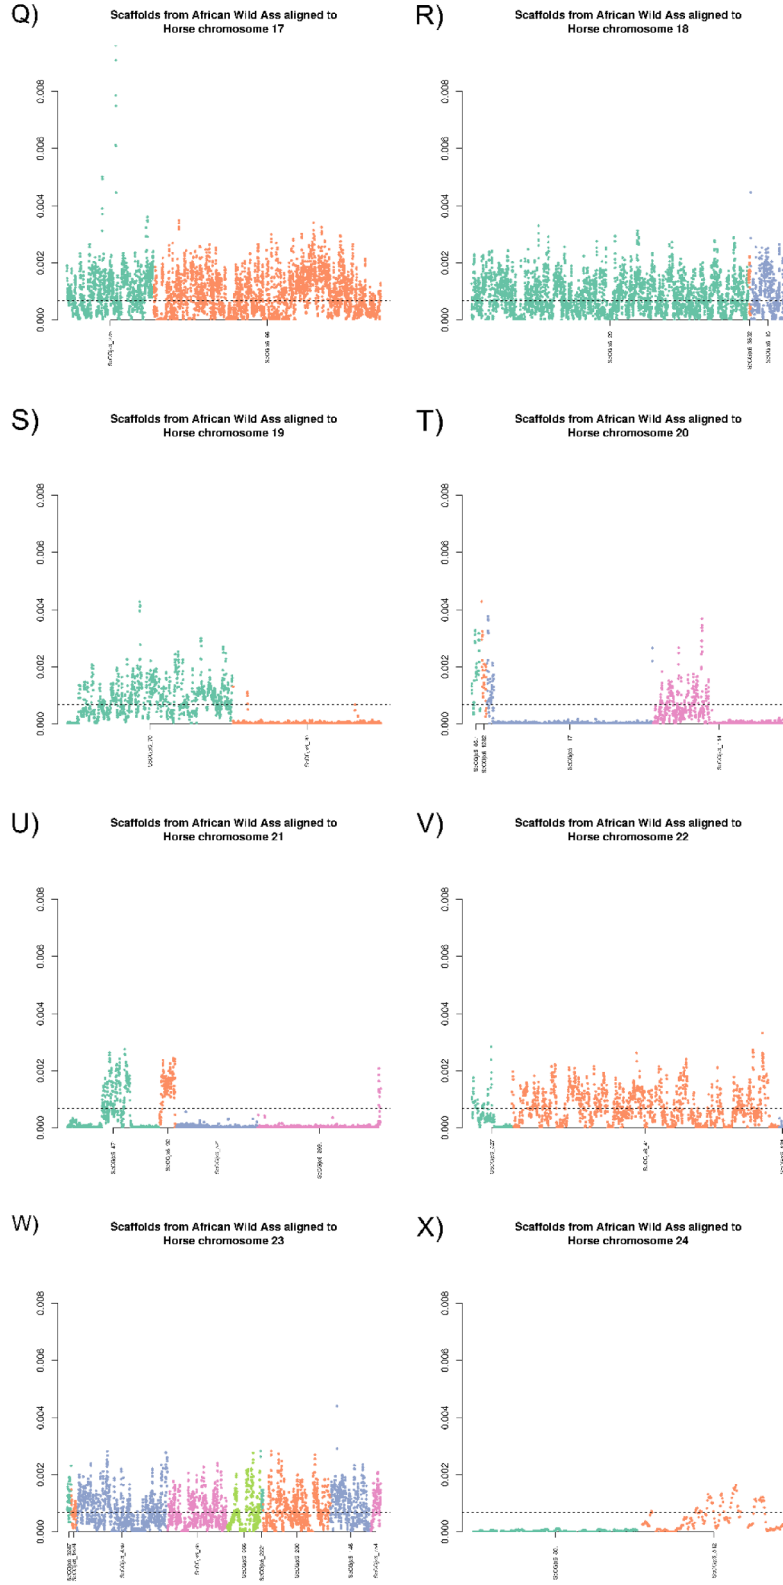

Fig. S9 4 of 4

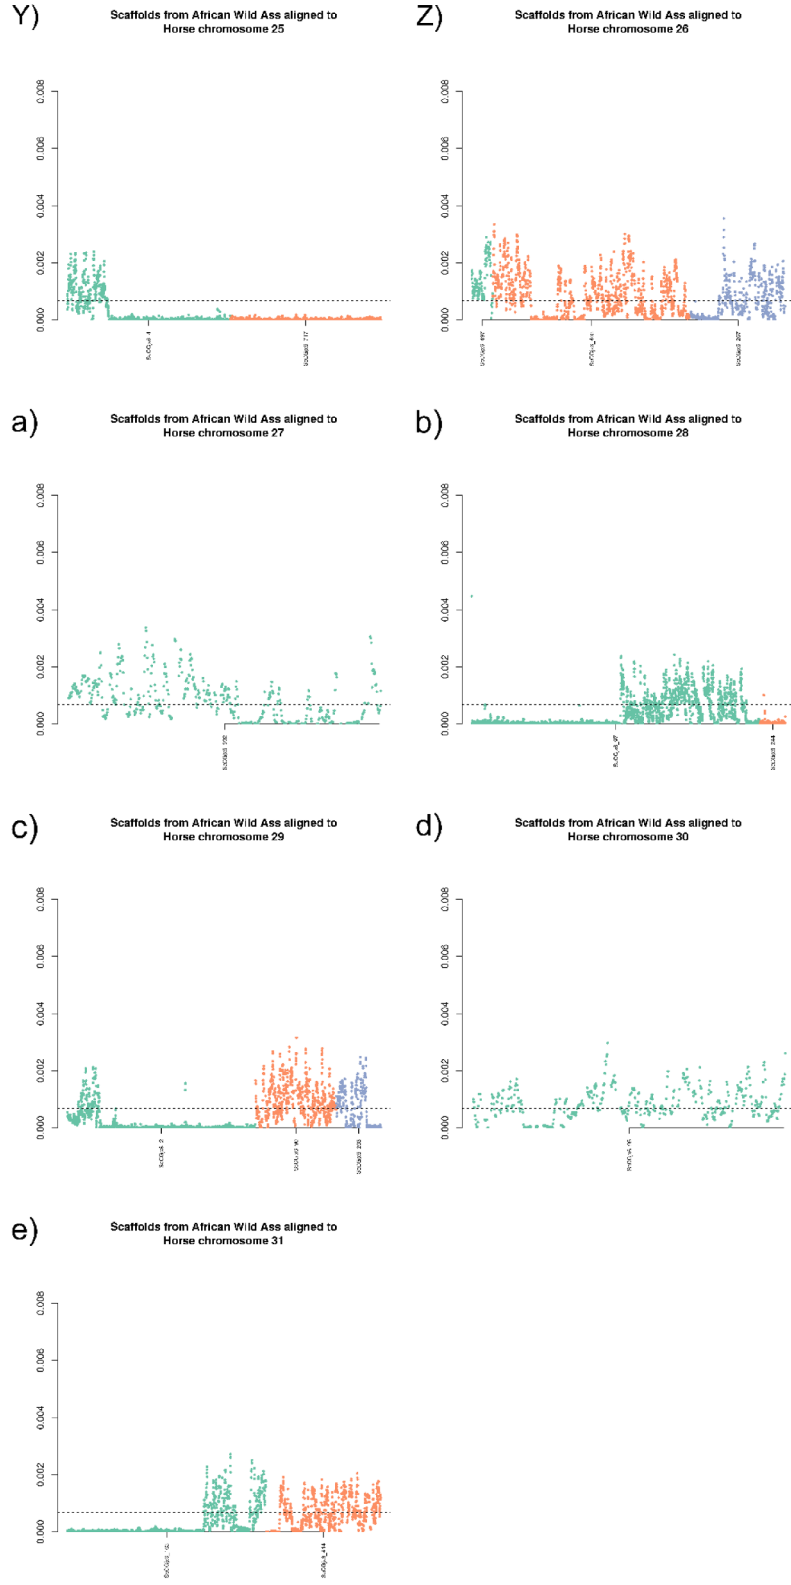



**table S1. Translocations found between the donkey and horse scaffolds.** The first three represent translocations for donkey scaffolds aligning to the same horse chromosome. The last six translocations are for donkey scaffolds that align to two different horse chromosomes.

|                 | Donkey scaffolds                      | Horse coordinates                | Description                                                                                                                                              | Figure        |
|-----------------|---------------------------------------|----------------------------------|----------------------------------------------------------------------------------------------------------------------------------------------------------|---------------|
| Translocation 1 | ScCGjx6_113:1,49<br>7-10,261,736      | chr15:29,315,938-39,718,792      | the last ~742 kb of ScCGjx6_113 map 8Mb away from the rest of the aligned scaffold, ScCGjx6_419 is found in between                                      | fig. S4<br>O) |
|                 | ScCGjx6_419:1,39<br>94-7,541,780      | chr15:39,767,787-47,354,651      |                                                                                                                                                          |               |
|                 | ScCGjx6_113:10,2<br>78,753-11,020,782 | chr15:47,359,895-48,089,680      |                                                                                                                                                          |               |
| Translocation 2 | ScCGjx6_161:13,4<br>60-4,479,819      | chr1:114,297,765-<br>119,020,414 | The alignment of ScCGjx6_161 is interrupted in the middle by an alignment of 9,7Mb to ScCGjx6_240, the unaligned portion of ScCGjx6_161 is found on ECA2 | fig. S4<br>A) |
|                 | ScCGjx6_240:10,0<br>24-9,454,019      | chr1:119,040,857-<br>128,716,420 |                                                                                                                                                          |               |
|                 | ScCGjx6_161:17,7<br>05,081-23,104,118 | chr1:128,737,306-<br>134,312,170 |                                                                                                                                                          |               |
| Translocation 3 | ScCGjx6_77:20,22<br>1-12,409,593      | chr22:24,084,620-36,522,341      | An alignment of 245 kb to ScCGjx6_1370 is found in the middle of scaffold ScCGjx6_77 (25Mb)                                                              | fig. S4<br>V) |
|                 | ScCGjx6_1370:43<br>95-253254          | chr22:36,548,355-36,794,213      |                                                                                                                                                          |               |
|                 | ScCGjx6_77:12,41<br>4,766-25,397,100  | chr22:36,851,421-49,910,038      |                                                                                                                                                          |               |
| Translocation 4 | ScCGjx6_168:15,6<br>09,437-9,407      | chr14:36,550,698-52,230,055      | ScCGjx6_168 spans the middle of ECA2 and 14                                                                                                              | fig. S3<br>B) |
|                 | ScCGjx6_168:15,6<br>36,073-25,881,750 | chr2:61,288,241-75,810,515       |                                                                                                                                                          |               |
| Translocation 5 | ScCGjx6_161:13,4<br>60-4,479,819      | chr1:114,297,765-<br>119,020,414 | ScCGjx6_161 starts on ECA1,                                                                                                                              | fig. S3<br>A) |

|                 |                                       |                                  |                                                                                     |               |
|-----------------|---------------------------------------|----------------------------------|-------------------------------------------------------------------------------------|---------------|
|                 | ScCGjx6_161:4,49<br>8,007-17,696,940  | chr2:75,816,382-89,056,597       | moves to ECA2<br>and moves back<br>to ECA1                                          |               |
|                 | ScCGjx6_161:17,7<br>05,081-23,122,153 | chr1:128,737,306-<br>134,312,170 |                                                                                     |               |
| Translocation 6 | ScCGjx6_69:<br>24,084,324-3,843       | chr19:35,686,863-59,971,246      | ScCGjx6_69<br>joins the middle<br>of ECA3 and the<br>end of ECA19                   | fig. S3<br>C) |
|                 | ScCGjx6_69:24,08<br>9,115-30,125,315  | chr3:65,994,971-72,154,088       |                                                                                     |               |
| Translocation 7 | ScCGjx6_42:20,84<br>2,070-2,313       | chr8:67,985,150-88,979,166       | ScCGjx6_42<br>joins the middle<br>of ECA10 and<br>chromosome 8<br>(towards the end) | fig. S3<br>D) |
|                 | ScCGjx6_42:20,84<br>2,070-51,953,946  | chr10:33,700,746-65,205,297      |                                                                                     |               |
| Translocation 8 | ScCGjx6_43:2,190<br>,086-2,233        | chr19:29,071-2,259,915           | ScCGjx6_43<br>spans the<br>beginning of<br>ECA15 and<br>ECA19                       | fig. S3<br>E) |
|                 | ScCGjx6_43:2,190<br>,086-5,271,059    | chr15:203,277-3,453,145          |                                                                                     |               |
| Translocation 9 | ScCGjx6_153:9,69<br>5-15,088,019      | chr17:65,701,400-80,747,902      | ScCGjx6_153<br>joins the end of<br>ECA17 and the<br>middle of ECA27                 | fig. S3<br>F) |
|                 | ScCGjx6_153:15,0<br>88,019-18,932,489 | chr27:29,582,427-33,520,420      |                                                                                     |               |

**table S2. Gene ontologies of biological processes and enriched Reactome pathways associated with genes found in donkey scaffolds with signs of inversions when compared to the horse genome.**

| <b>Gene ontology</b>                               | <b>P-value</b> | <b>FDR</b> | <b>Genes</b>                                                 |
|----------------------------------------------------|----------------|------------|--------------------------------------------------------------|
| Organonitrogen compound catabolic process          | 7.00E-05       | 5.33E-02   | PDE10A;KERA;AMDHD1;ALDH1L2;DCN;HAL;LTA4H;LUM;PAH;STAB2;TDG   |
| Regulation of DNA metabolic process                | 3.32E-04       | 1.26E-01   | APAF1;IGF1;MAP3K4;KITLG;PARPBP;PPP2R1A;RFC5;TCP1;UBE2N;CDK1  |
| Aromatic compound catabolic process                | 8.22E-04       | 1.92E-01   | PDE10A;AMDHD1;PNLDC1;ALDH1L2;HAL;APAF1;PAH;PPP2R1A;RPL11;TDG |
| Organic cyclic compound catabolic process          | 1.01E-03       | 1.92E-01   | PDE10A;AMDHD1;PNLDC1;ALDH1L2;HAL;APAF1;PAH;PPP2R1A;RPL11;TDG |
| Carbohydrate derivative catabolic process          | 1.64E-03       | 2.50E-01   | PDE10A;KERA;DCN;LUM;STAB2;TDG                                |
| Heterocycle catabolic process                      | 2.13E-03       | 2.64E-01   | PDE10A;AMDHD1;PNLDC1;ALDH1L2;HAL;APAF1;PPP2R1A;RPL11;TDG     |
| Cellular nitrogen compound catabolic process       | 2.42E-03       | 2.64E-01   | PDE10A;AMDHD1;PNLDC1;ALDH1L2;HAL;APAF1;PPP2R1A;RPL11;TDG     |
| Regulation of embryonic development                | 5.04E-03       | 4.80E-01   | AMOT;DUSP6;IGF1;CDK1                                         |
| Regulation of protein stability                    | 6.10E-03       | 5.16E-01   | GAPDH;IGF1;USP28;TCP1;USP4;USP2                              |
| Dicarboxylic acid metabolic process                | 7.49E-03       | 5.70E-01   | AMDHD1;ALDH1L2;HAL;NR1H4                                     |
| <b>Pathway</b>                                     | <b>P-value</b> | <b>FDR</b> | <b>Genes</b>                                                 |
| Cilium Assembly                                    | 2.43E-04       | 1.06E-01   | FGFR1OP;NEDD1;CEP83;PPP2R1A;TCP1;TCTE3;CEP290;CDK1           |
| Anchoring of the basal body to the plasma membrane | 3.34E-04       | 1.06E-01   | FGFR1OP;NEDD1;CEP83;PPP2R1A;CEP290;CDK1                      |
| Loss of Nlp from mitotic centrosomes               | 4.94E-04       | 1.06E-01   | FGFR1OP;NEDD1;PPP2R1A;CEP290;CDK1                            |

|                                                                                       |          |          |                                                                  |
|---------------------------------------------------------------------------------------|----------|----------|------------------------------------------------------------------|
| Loss of proteins required for interphase microtubule organization from the centrosome | 4.94E-04 | 1.06E-01 | FGFR1OP;NEDD1;PPP2R1A;CEP290;CDK1                                |
| Organelle biogenesis and maintenance                                                  | 5.48E-04 | 1.06E-01 | FGFR1OP;NEDD1;MRPL42;MRPL18;CEP83;PPP2R1A;TCP1;TCTE3;CEP290;CDK1 |
| AURKA Activation by TPX2                                                              | 6.12E-04 | 1.06E-01 | FGFR1OP;NEDD1;PPP2R1A;CEP290;CDK1                                |
| Recruitment of mitotic centrosome proteins and complexes                              | 6.79E-04 | 1.06E-01 | FGFR1OP;NEDD1;PPP2R1A;CEP290;CDK1                                |
| Centrosome maturation                                                                 | 6.79E-04 | 1.06E-01 | FGFR1OP;NEDD1;PPP2R1A;CEP290;CDK1                                |
| Regulation of PLK1 Activity at G2/M Transition                                        | 1.09E-03 | 1.53E-01 | FGFR1OP;NEDD1;PPP2R1A;CEP290;CDK1                                |
| Diseases associated with glycosaminoglycan metabolism                                 | 1.46E-03 | 1.84E-01 | KERA;DCN;LUM                                                     |

**table S3. Human phenotypes, human diseases, and pathways associated with genes enriched in detected ROHs.**

| <b>Human phenotype</b>            | <b>P-value</b> | <b>FDR</b> | <b>Genes</b>                                                                                       |
|-----------------------------------|----------------|------------|----------------------------------------------------------------------------------------------------|
| <b>ROHs &gt;1Mb</b>               |                |            |                                                                                                    |
| Deep palmar crease                | 2.66E-04       | 9.85E-01   | ASXL1;PAFAH1B1;YWHAE                                                                               |
| Recurrent aspiration pneumonia    | 1.79E-03       | 1.00E+00   | PAFAH1B1;YWHAE                                                                                     |
| Thick upper lip vermilion         | 2.66E-03       | 1.00E+00   | PAFAH1B1;YWHAE                                                                                     |
| Aspiration pneumonia              | 2.66E-03       | 1.00E+00   | PAFAH1B1;YWHAE                                                                                     |
| <b>ROH 500 kb-1Mb</b>             |                |            |                                                                                                    |
| Polydipsia                        | 6.55E-04       | 8.98E-01   | KCNJ1;AVP;CEP290                                                                                   |
| Abnormal drinking behavior        | 6.55E-04       | 8.98E-01   | KCNJ1;AVP;CEP290                                                                                   |
| Hypokalemia                       | 8.74E-04       | 8.98E-01   | KCNJ1;KCNJ5;AVP                                                                                    |
| Polyuria                          | 1.00E-03       | 8.98E-01   | KCNJ1;AVP;CEP290                                                                                   |
| <b>ROHs 100 kb-500 kb</b>         |                |            |                                                                                                    |
| Stomatocytosis                    | 6.41E-04       | 1.00E+00   | RHAG;ABCG5;ABCG8                                                                                   |
| Biliary tract abnormality         | 2.54E-03       | 1.00E+00   | EHHADH;IFT172;IL12RB1;DCTN4;PEX12;PHKG2;PIK3CA;PKHD1;PTPN3;PEX2;BBS10;CLDN1                        |
| CNS demyelination                 | 3.02E-03       | 1.00E+00   | LRPPRC;PEX12;FOXRED1;NDUFA12;PEX2;SDHA;EIF2B4;EIF2B5                                               |
| Abnormality of the biliary system | 4.12E-03       | 1.00E+00   | EHHADH;ANKS6;IFT172;IL12RB1;MPV17;DCTN4;PEX12;PHKG2;PIK3CA;PKHD1;PTPN3;PEX2;RHAG;ABCG8;BBS10;CLDN1 |
| <b>Human disease</b>              | <b>P-value</b> | <b>FDR</b> | <b>Genes</b>                                                                                       |
| <b>ROHs &gt;1Mb</b>               |                |            |                                                                                                    |
| Muscle Weakness                   | 3.82E-04       | 1.62E-01   | HUNK;MIS18A;SCAF4;SOD1;TIAM1;URB1                                                                  |
| Down Syndrome                     | 5.21E-04       | 1.62E-01   | HUNK;MIS18A;SCAF4;SOD1;TIAM1;URB1                                                                  |
| Epithelial ovarian cancer         | 7.29E-04       | 1.62E-01   | TIPARP;ATAD5;CHMP4C                                                                                |
| Turner Syndrome                   | 1.97E-03       | 2.43E-01   | NOS2;SOD1                                                                                          |

| <b>ROH 500 kb-1Mb</b>                                              |                |            |                                                                                                  |
|--------------------------------------------------------------------|----------------|------------|--------------------------------------------------------------------------------------------------|
| Down Syndrome                                                      | 0.00E+00       | 0.00E+00   | USP16;CCT8;CYR1;GART;N6AMT1;DONSON;IFNAR1;IFNGR2;MAP3K7CL;BACH1;ITSN1;SON;TMEM50B;ADAMTS1;CRYZL1 |
| Muscle Weakness                                                    | 0.00E+00       | 0.00E+00   | USP16;CCT8;CYR1;GART;N6AMT1;DONSON;IFNAR1;IFNGR2;MAP3K7CL;BACH1;ITSN1;SON;TMEM50B;ADAMTS1;CRYZL1 |
| Small cell carcinoma of lung                                       | 1.43E-02       | 1.00E+00   | AVP;SOX2                                                                                         |
| Myocardial Ischemia                                                | 1.69E-02       | 1.00E+00   | APLP2;JAK2;KITLG;VEGFA                                                                           |
| <b>ROHs 100 kb-500kb</b>                                           |                |            |                                                                                                  |
| Muscle Weakness                                                    | 2.75E-06       | 1.71E-03   | MORC3;CLDN14;GABPA;BRWD1;MRPL39;JAM2;SH3BG;SIM2;CHAF1B;PSMG1;SYNJ1;PAXBP1                        |
| Down Syndrome                                                      | 5.13E-06       | 1.71E-03   | MORC3;CLDN14;GABPA;BRWD1;MRPL39;JAM2;SH3BG;SIM2;CHAF1B;PSMG1;SYNJ1;PAXBP1                        |
| Neuroectodermal Tumor, Primitive                                   | 1.29E-03       | 2.87E-01   | EWSR1;HEY1;HES1                                                                                  |
| Weight Gain                                                        | 3.96E-03       | 5.96E-01   | MAPRE1;PRKD3;IPO11;PIK3CA;SPARC;ADIPOQ;FEZ2                                                      |
| <b>Pathways</b>                                                    | <b>P-value</b> | <b>FDR</b> | <b>Genes</b>                                                                                     |
| <b>ROHs &gt;1Mb</b>                                                |                |            |                                                                                                  |
| Hormone-sensitive lipase (HSL)-mediated triacylglycerol hydrolysis | 3.42E-05       | 4.80E-02   | FABP4;FABP5;FABP9;FABP12                                                                         |
| Antimicrobial peptides                                             | 5.70E-03       | 1.00E+00   | BPIFB6;BPIFB4;BPIFB2                                                                             |
| HSF1 activation                                                    | 7.40E-03       | 1.00E+00   | RPA1;YWHAE                                                                                       |
| AURKA Activation by TPX2                                           | 1.27E-02       | 1.00E+00   | MAPRE1;TPX2;PAFAH1B1;YWHAE                                                                       |
| <b>ROH 500 kb-1Mb</b>                                              |                |            |                                                                                                  |
| Inwardly rectifying K+ channels                                    | 4.63E-03       | 1.00E+00   | KCNJ1;KCNJ5                                                                                      |
| Regulation of IFNG signaling                                       | 5.44E-03       | 1.00E+00   | IFNGR2;JAK2                                                                                      |
| Platelet degranulation                                             | 6.92E-03       | 1.00E+00   | APLP2;GTPBP2;CDC37L1;VEGFA                                                                       |

|                                                                  |          |          |                                                                                      |
|------------------------------------------------------------------|----------|----------|--------------------------------------------------------------------------------------|
| Response to elevated platelet cytosolic Ca <sup>2+</sup>         | 7.20E-03 | 1.00E+00 | APLP2;GTPBP2;CDC37L1;VEGFA                                                           |
| <b>ROHs 100 kb-500kb</b>                                         |          |          |                                                                                      |
| Hyaluronan metabolism                                            | 4.99E-03 | 1.00E+00 | ABCC5;GUSB;STAB2                                                                     |
| O-linked glycosylation of mucins                                 | 6.84E-03 | 1.00E+00 | MUC20;GALNT10;WBSCR17;ST6GAL1;GALNT12                                                |
| Metabolism of carbohydrates                                      | 8.55E-03 | 1.00E+00 | ABCC5;KERA;GAPDH;GLB1;GUSB;NDST1;SLC35B2;PHKG1;PHKG2;STAB2;XYLT2;SLC2A2;SLC5A2;NUP37 |
| RNA Polymerase III Transcription Initiation From Type 2 Promoter | 9.38E-03 | 1.00E+00 | CRCP;GTF3C2;POLR2H;POLR3B                                                            |

**table S4. Horse sequences used for the detection of donkey scaffolds pertaining to the Y chromosome.**

| <b>NCBI nucleotide ID</b> | <b>GenBank accession</b> | <b>Length (bp)</b> |
|---------------------------|--------------------------|--------------------|
| 406356568                 | JX647038.1               | 27711              |
| 406356560                 | JX647030.1               | 34694              |
| 406356544                 | JX647022.1               | 11087              |
| 406356536                 | JX647014.1               | 10486              |
| 406356528                 | JX647006.1               | 5528               |
| 406356520                 | JX646998.1               | 7619               |
| 406356512                 | JX646990.1               | 8830               |
| 406356504                 | JX646982.1               | 9393               |
| 406356496                 | JX646974.1               | 8508               |
| 406356488                 | JX646966.1               | 10880              |
| 406356480                 | JX646958.1               | 17810              |
| 406356472                 | JX646950.1               | 18678              |
| 406356464                 | JX646942.1               | 14899              |
| 20373117                  | G72338.1                 | 400                |
| 20373114                  | G72335.1                 | 528                |
| 20373118                  | G72339.1                 | 255                |
| 29126040                  | AB091794.1               | 5591               |
| 42525419                  | AY532879.1               | 452                |
| 20373115                  | G72336.1                 | 508                |



**table S5. Heterozygosity rates for various species of asses and zebras computed when aligning to the donkey reference described in this study and recomputed on the basis of the data reported by Jónsson *et al.* (9), which were aligned to the horse reference.**

| Species name              | Binomial nomenclature              | Depth-of-coverage (reads) | Heterozygosity rate (aligned to donkey) | Heterozygosity rate (aligned to horse) |
|---------------------------|------------------------------------|---------------------------|-----------------------------------------|----------------------------------------|
| Somali wild ass           | <i>Equus africanus somaliensis</i> | 26.9                      | 0.05747±0.00265%                        | 0.081221%                              |
| Grévy's zebra             | <i>Equus grevyi</i>                | 20.8                      | 0.09410±0.00266%                        | 0.113645%                              |
| Onager                    | <i>Equus hemionus</i>              | 22.0                      | 0.18138±0.00266%                        | 0.210421%                              |
| Kiang                     | <i>Equus kiang</i>                 | 12.1                      | 0.10419±0.00266%                        | 0.128137%                              |
| Burchell's zebra          | <i>Equus quagga burchellii</i>     | 26.4                      | 0.21491±0.00266%                        | 0.265465%                              |
| Hartmann's mountain zebra | <i>Equus zebra hartmannae</i>      | 21.5                      | 0.08159±0.00266%                        | 0.0999795%                             |
| Domestic donkey           | <i>Equus africanus asinus</i>      | 61.2                      | 0.06814±0.00264%                        | 0.113711%                              |

**table S6. Listing missing proteins in complete and partially complete Eukaryotic Orthologous Groups from the Core Eukaryotic Genes Mapping Approach.**

| <b>Complete KOGs</b>         |         |         |         |         |         |         |         |
|------------------------------|---------|---------|---------|---------|---------|---------|---------|
| KOG0018                      | KOG0025 | KOG0176 | KOG0179 | KOG0182 | KOG0184 | KOG0188 | KOG0209 |
| KOG0261                      | KOG0276 | KOG0291 | KOG0292 | KOG0357 | KOG0361 | KOG0364 | KOG0365 |
| KOG0376                      | KOG0400 | KOG0424 | KOG0434 | KOG0462 | KOG0477 | KOG0481 | KOG0556 |
| KOG0559                      | KOG0741 | KOG0780 | KOG0862 | KOG0871 | KOG0964 | KOG0969 | KOG0985 |
| KOG0991                      | KOG1058 | KOG1099 | KOG1112 | KOG1123 | KOG1137 | KOG1145 | KOG1185 |
| KOG1211                      | KOG1241 | KOG1299 | KOG1335 | KOG1349 | KOG1355 | KOG1358 | KOG1373 |
| KOG1458                      | KOG1463 | KOG1498 | KOG1532 | KOG1540 | KOG1549 | KOG1555 | KOG1647 |
| KOG1746                      | KOG1795 | KOG1816 | KOG1872 | KOG1889 | KOG1942 | KOG2004 | KOG2036 |
| KOG2044                      | KOG2303 | KOG2311 | KOG2415 | KOG2446 | KOG2451 | KOG2472 | KOG2481 |
| KOG2531                      | KOG2535 | KOG2537 | KOG2572 | KOG2575 | KOG2613 | KOG2623 | KOG2680 |
| KOG2719                      | KOG2775 | KOG2807 | KOG2909 | KOG2916 | KOG2930 | KOG2967 | KOG3013 |
| KOG3049                      | KOG3157 | KOG3174 | KOG3180 | KOG3189 | KOG3239 | KOG3297 | KOG3313 |
| KOG3404                      | KOG3855 | KOG3954 |         |         |         |         |         |
| <b>Partial complete KOGs</b> |         |         |         |         |         |         |         |
| KOG0365                      | KOG0741 | KOG1358 | KOG1816 | KOG1872 | KOG1889 | KOG1942 | KOG2451 |
| KOG2472                      | KOG2531 | KOG2575 | KOG2613 | KOG2719 | KOG3954 |         |         |

**table S7. Repeat elements and low-complexity DNA sequences masked in the donkey genome using RepeatMasker.** The table is showing the number of elements for the different types of SINEs, LINES, LTR elements, DNA elements and small rRNA and satellites masked in the donkey genome. Furthermore, the total length in bp and the percentage of masked sequence for each category is listed.

| <b>bases masked: 920,991,241 bp (39.68 %)</b> |              |                     |                       |                        |
|-----------------------------------------------|--------------|---------------------|-----------------------|------------------------|
|                                               |              | Number of elements* | Length occupied       | Percentage of sequence |
| <b>SINEs:</b>                                 |              | <b>981,574</b>      | <b>167,801,528 bp</b> | <b>7.23 %</b>          |
|                                               | Alu/B1       | 9                   | 707 bp                | 0.00 %                 |
|                                               | MIRs         | 589,657             | 82,854,837 bp         | 3.57 %                 |
| <b>LINES:</b>                                 |              | <b>1,004,122</b>    | <b>445,910,954 bp</b> | <b>19.21 %</b>         |
|                                               | LINE1        | 518,939             | 315,463,444 bp        | 13.59 %                |
|                                               | LINE2        | 417,636             | 113,787,977 bp        | 4.90 %                 |
|                                               | L3/CR1       | 53,387              | 12,250,891 bp         | 0.53 %                 |
|                                               | RTE          | 13,118              | 4,224,920 bp          | 0.18 %                 |
| <b>LTR elements:</b>                          |              | <b>428,117</b>      | <b>171,420,149 bp</b> | <b>7.39 %</b>          |
|                                               | ERV_L        | 108,139             | 52,444,566 bp         | 2.26 %                 |
|                                               | ERV_L-MaLRs  | 175,510             | 65,261,362 bp         | 2.81 %                 |
|                                               | ERV_classI   | 79,265              | 41,584,018 bp         | 1.79 %                 |
|                                               | ERV_classII  | 33,143              | 2,942,704 bp          | 0.13 %                 |
| <b>DNA elements:</b>                          |              | <b>417,275</b>      | <b>91,394,731 bp</b>  | <b>3.94 %</b>          |
|                                               | hAT-Charlie  | 229,200             | 46,401,915 bp         | 2.00 %                 |
|                                               | TcMar-Tigger | 73,698              | 21,448,450 bp         | 0.92 %                 |
| <b>Unclassified:</b>                          |              | <b>7,850</b>        | <b>1,541,532 bp</b>   | <b>0.07 %</b>          |
| <b>Total interspersed repeats:</b>            |              |                     | <b>878,068,894 bp</b> | <b>37.83 %</b>         |
| Small RNA:                                    |              | 372,003             | 80,855,800 bp         | 3.48 %                 |

|                 |  |        |               |        |
|-----------------|--|--------|---------------|--------|
| Satellites:     |  | 84,842 | 42,804,139 bp | 1.84 % |
| Simple repeats: |  | 0      | 0             | 0.00 % |
| Low complexity: |  | 0      | 0             | 0.00 % |

\* most repeats fragmented by insertions or deletions have been counted as one element

**table S8. Repeat elements and low-complexity DNA sequences masked in the donkey genome using the second of the RepeatMasker using the model generated from RepeatModeler as custom library input on the previously masked genome.** The table is showing the number of elements for the different types of SINEs, LINEs, LTR elements, DNA elements and small RNA and satellites masked in the donkey genome. Furthermore the total length in bp and the percentage of masked sequence for each category is listed.

| <b>Bases masked: 7657033 bp (0.33 %)</b> |             |                     |                     |                        |
|------------------------------------------|-------------|---------------------|---------------------|------------------------|
|                                          |             | Number of elements* | Length occupied     | Percentage of sequence |
| <b>SINEs:</b>                            |             | <b>0</b>            | <b>0 bp</b>         | <b>0.00 %</b>          |
|                                          | Alu/B1      | 0                   | 0 bp                | 0.00 %                 |
|                                          | MIRs        | 0                   | 0 bp                | 0.00 %                 |
| <b>LINEs:</b>                            |             | <b>6,264</b>        | <b>2,169,302 bp</b> | <b>0.09 %</b>          |
|                                          | LINE1       | 4,010               | 1,025,059 bp        | 0.04 %                 |
|                                          | LINE2       | 598                 | 39,096 bp           | 0.00 %                 |
|                                          | L3/CR1      | 0                   | 0 bp                | 0.00 %                 |
| <b>LTR elements:</b>                     |             | <b>3,577</b>        | <b>637,692 bp</b>   | <b>0.03 %</b>          |
|                                          | ERVL        | 903                 | 228,918 bp          | 0.01 %                 |
|                                          | ERVL-MaLRs  | 1,936               | 265,014 bp          | 0.01 %                 |
|                                          | ERV_classI  | 738                 | 143,760 bp          | 0.01 %                 |
|                                          | ERV_classII | 0                   | 0 bp                | 0.00 %                 |
| <b>DNA elements:</b>                     |             | <b>12,599</b>       | <b>1,584,888 bp</b> | <b>0.07 %</b>          |
|                                          | hAT-Charlie | 0                   | 0 bp                | 0.00 %                 |

|                                    |              |              |                     |               |
|------------------------------------|--------------|--------------|---------------------|---------------|
|                                    | TcMar-Tigger | 733          | 264,345 bp          | 0.01 %        |
| <b>Unclassified:</b>               |              | <b>5,591</b> | <b>1,761,449 bp</b> | <b>0.08 %</b> |
| <b>Total interspersed repeats:</b> |              |              | <b>6,153,331 bp</b> | <b>0.27 %</b> |
| Small RNA:                         |              | 0            | 0 bp                | 0.00 %        |
| Satellites:                        |              | 616          | 425,075 bp          | 0.02 %        |
| Simple repeats:                    |              | 6,922        | 1,080,429 bp        | 0.05 %        |
| Low complexity:                    |              | 0            | 0                   | 0.00 %        |

\* most repeats fragmented by insertions or deletions have been counted as one element

**table S9. Statistics of the completeness of the different versions of the donkey genome based on 248 Core Eukaryotic Genes.** ‘Complete (%)’ refers to the predicted proteins that could be aligned to the HMMs of a KOG for a given protein family from the CEGMA dataset consisting of 248 CEGs. ‘Partial complete (%)’ refers to incomplete proteins. Complete genomes will also be included in the ‘Partial’ set.

| <b>Genome sequence</b>                   | <b>Complete (%)</b> | <b>Partial complete (%)</b> |
|------------------------------------------|---------------------|-----------------------------|
| Current Donkey assembly repeatmasked     | 60.08               | 94.35                       |
| Current Donkey assembly non-repeatmasked | 60.48               | 94.35                       |
| Huang et al. 2015                        | 57.26               | 92.34                       |
| Orlando et al 2013                       | 41.13               | 86.69                       |
